# Supplementary material for: Synthesis and Properties Evolution of a Family of Tiara-like Phenylethanethiolated Palladium Nanoclusters
Source: PubMed Central journal article supplement (PMC4644969; doi:10.1038/srep16628), 2015-11-16
Supplement: srep16628-s1.pdf [file srep16628-s1.pdf]

# Synthesis and Properties Evolution of a Family of Tiara-like Phenylethanethiolated Palladium Nanoclusters

Jishi Chen,<sup>1,2</sup> Liren Liu,<sup>3</sup> Linhong Weng,<sup>4</sup> Yuejian Lin,<sup>4</sup> Lingwen Liao,<sup>1</sup> Chengming Wang,<sup>3</sup> Jin-long Yang,<sup>3</sup>

and Zhikun Wu<sup>1</sup>

<sup>1</sup> Key Laboratory of Materials Physics, Anhui Key Laboratory of Nanomaterials and Nanostructures, Institute of Solid State Physics, Chinese Academy of Sciences, Hefei 230031, China

<sup>2</sup> Department of Materials Science and Engineering, University of Science and Technology of China, Hefei, 230026, China

<sup>3</sup> Hefei National Laboratory for Physics Sciences at the Microscale, University of Science and Technology of China, Hefei, 230026, China

<sup>4</sup> Shanghai Key Laboratory of Molecular Catalysis and Innovative Materials, Department of Chemistry, Fudan University, Shanghai, 200433, China

**This supplementary information includes:**

Chemicals

Theoretical calculation method

Figure S1 MALDI-MS of  $[\text{Pd}(\text{SC}_2\text{H}_4\text{Ph})_2]_n$  ( $4 \leq n \leq 20$ ).

Figure S2 The single crystal structure of  $[\text{Pd}(\text{SC}_2\text{H}_4\text{Ph})_2]_6$ .

Figure S3 Optimized molecular structure and optimized/experimental optical spectra of  $[\text{Pd}(\text{SCH}_3)_2]_n$  ( $4 \leq n \leq 10$ ).

Figure S4 XPS spectra.

Figure S5 FIIR absorption spectra.

Figure S6 UV/Vis absorption spectra of  $[\text{Pd}(\text{SC}_2\text{H}_4\text{Ph})_2]_n$  ( $4 \leq n \leq 20$ ).

Figure S7 Differential pulse voltammetry (DPV) of  $[\text{Pd}(\text{SC}_2\text{H}_4\text{Ph})_2]_n$  ( $5 \leq n \leq 15$ ).

Figure S8 Anti-reductive properties of  $[\text{Pd}(\text{SC}_2\text{H}_4\text{Ph})_2]_6$ .

Figure S9 Anti-oxidative properties of  $[\text{Pd}(\text{SC}_2\text{H}_4\text{Ph})_2]_6$ .

Figure S10 Long-term stability of  $[\text{Pd}(\text{SC}_2\text{H}_4\text{Ph})_2]_6$ .

Figure S11 UV/Vis absorption spectra of toluene solutions of  $[\text{Pd}(\text{SC}_2\text{H}_4\text{Ph})_2]_n$  at 80 °C for different times under air atmosphere.

Figure S12 TGA of  $[\text{Pd}(\text{SC}_2\text{H}_4\text{Ph})_2]_6$ .

Table S1 Summary of tiara-like  $[\text{M}(\text{SR})_2]_n$  (M=Ni, Pd, Pt) nanoclusters.

Table S2 Summary of differential pulse voltammetry (DPV) and UV/vis absorption results of  $[\text{Pd}(\text{SC}_2\text{H}_4\text{Ph})_2]_n$  ( $5 \leq n \leq 15$ ).

Table S3. Crystal data and structure refinement for  $[\text{Pd}(\text{SC}_2\text{H}_4\text{Ph})_2]_6$ .

Table S4. Atomic coordinates ( $\times 10^4$ ) and equivalent isotropic displacement parameters ( $\text{\AA}^2 \times 10^3$ ) for  $[\text{Pd}(\text{SC}_2\text{H}_4\text{Ph})_2]_6$ .

Table S5. Bond lengths [ $\text{\AA}$ ] and angles [ $^\circ$ ] for  $[\text{Pd}(\text{SC}_2\text{H}_4\text{Ph})_2]_6$ .

Table S6. Anisotropic displacement parameters ( $\text{\AA}^2 \times 10^3$ ) for  $[\text{Pd}(\text{SC}_2\text{H}_4\text{Ph})_2]_6$ .

Table S7. Hydrogen coordinates ( $\times 10^4$ ) and isotropic displacement parameters ( $\text{\AA}^2 \times 10^3$ ) for  $[\text{Pd}(\text{SC}_2\text{H}_4\text{Ph})_2]_6$ .

References.

## Chemicals

2-phenylethanethiol ( $\text{PhC}_2\text{H}_4\text{SH}$ , 99%) was purchased from Sigma-Aldrich.

Palladium nitrate dihydrate ( $\text{Pd}(\text{NO}_3)_2 \cdot 2\text{H}_2\text{O}$ , AR, 97.0%) was purchased from Shanghai chemical reagent co., ltd.

Acetonitrile ( $\text{CH}_3\text{CN}$ , AR grade, 99.0%), triethylamine ( $\text{N}(\text{Et})_3$ , AR grade, 99.0%), methanol ( $\text{CH}_3\text{OH}$ , AR grade, 99.7%), dichloromethane ( $\text{CH}_2\text{Cl}_2$ , AR, 99.7%), n-hexane ( $\text{C}_6\text{H}_{14}$ , AR, 97.0%), toluene ( $\text{C}_7\text{H}_8$ , AR grade, 99.5%) were purchased from Sinopharm chemical reagent co., ltd.

All chemicals are commercially available and used as received except acetonitrile, through which Argon (99.99% Nanjing Special Gas Corp.) was bubbled. Nanopure water (resistivity 18.2  $\text{M}\Omega \text{ cm}$ ) was produced with a Barnstead NANO pure water system.

## Theoretical calculation method

The geometry optimizations and the ultraviolet/visible (UV/Vis) absorption spectrum of  $[\text{Pd}(\text{SC}_2\text{H}_4\text{Ph})_2]_n$  ( $4 \leq n \leq 10$ ) nanoclusters were performed by using density functional theory (DFT) and time-dependent density functional theory (TDDFT) at B3LYP<sup>[S1-S4]</sup>/LANL2DZ<sup>[S5-S7]</sup>/6-31G\*<sup>[S8,S9]</sup> level. The effective core potential (ECP) basis set LanL2DZ associated with the pseudopotential was used to describe the Pd atoms, whereas the basis sets of 6-31G\* was used for C, S and H atoms. Gaussian band shape with a bandwidth of 0.4 eV was used to simulate the UV/vis spectrum. Due to computing capability, we used  $\text{SCH}_3$  instead of  $\text{SC}_2\text{H}_4\text{Ph}$  for simplicity. All of the calculations in this work were carried out using the Gaussian09 program package<sup>[S10]</sup>.

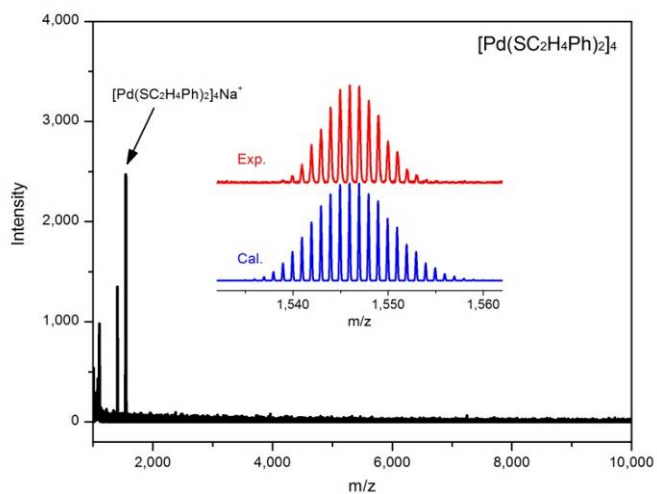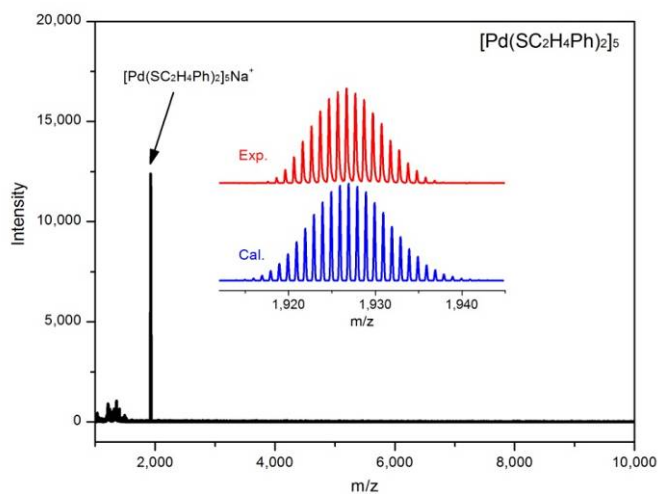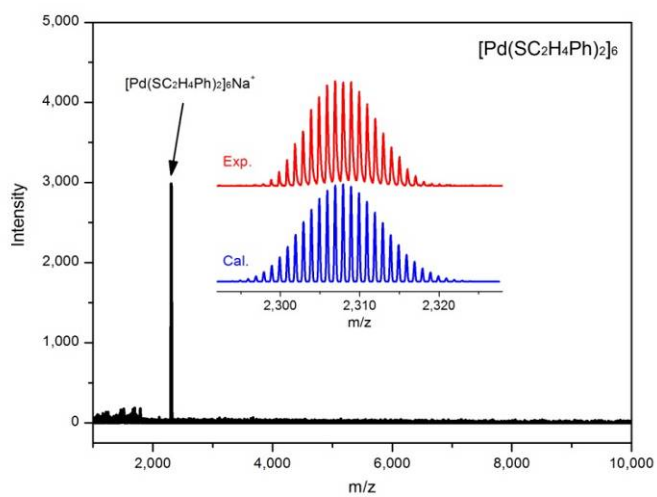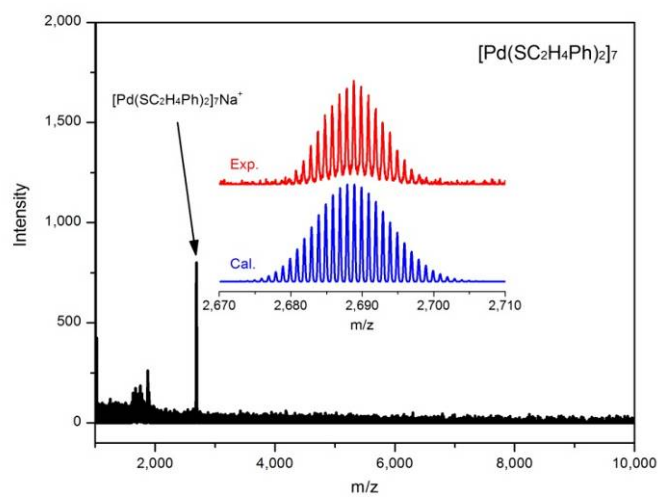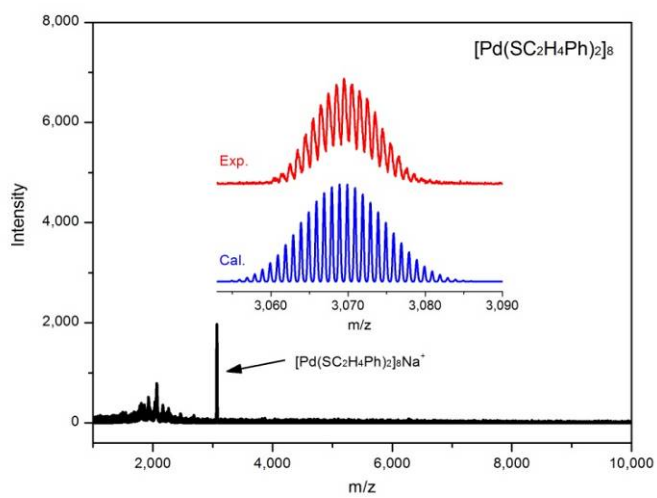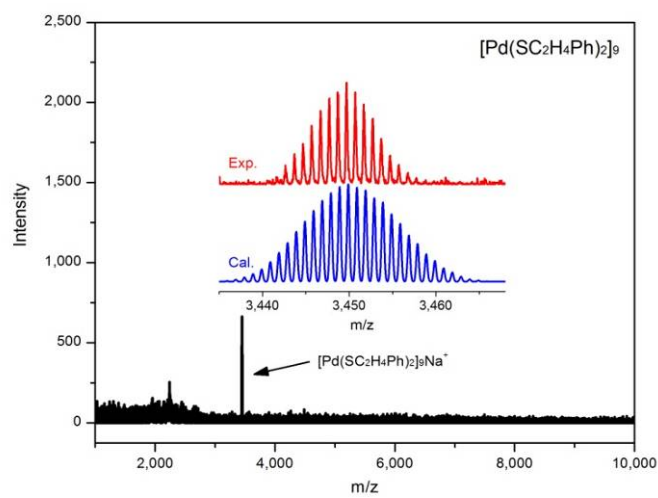

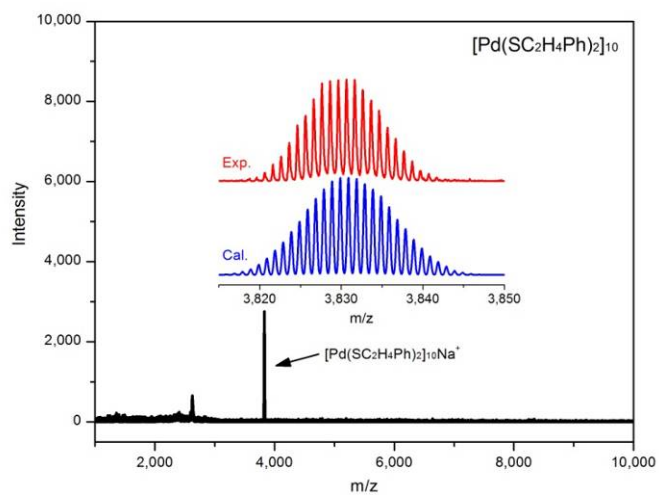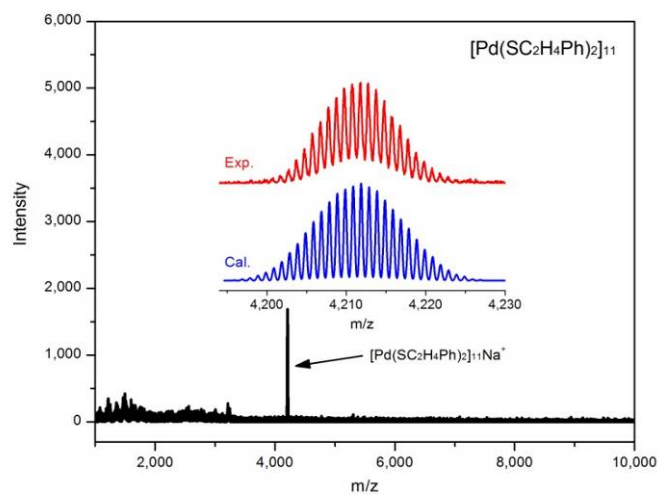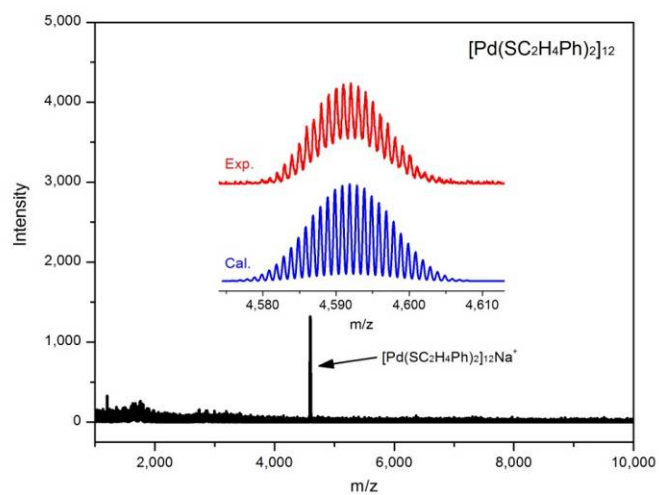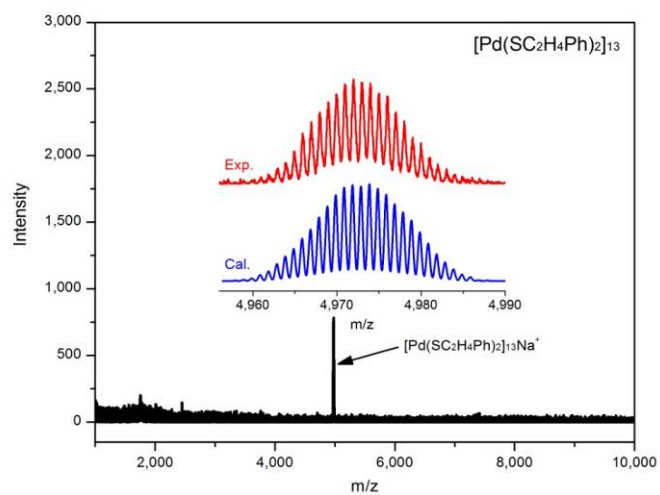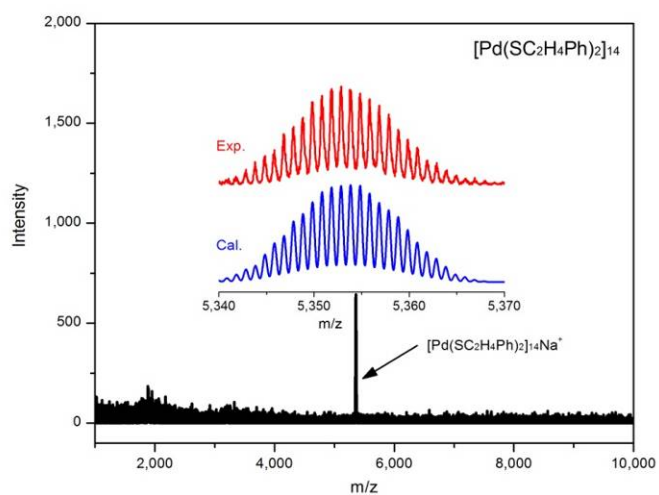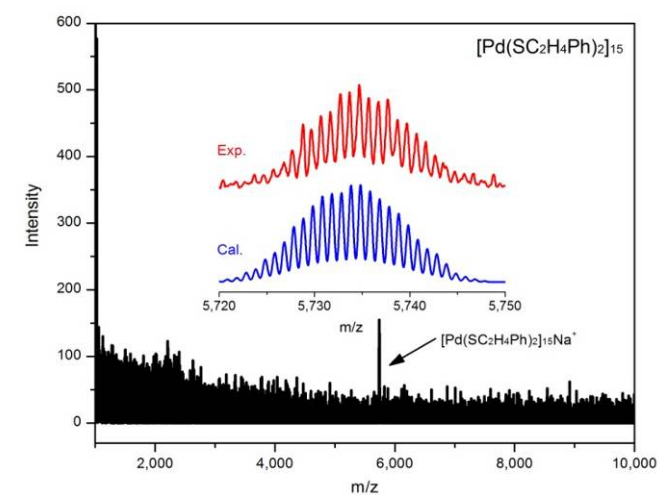

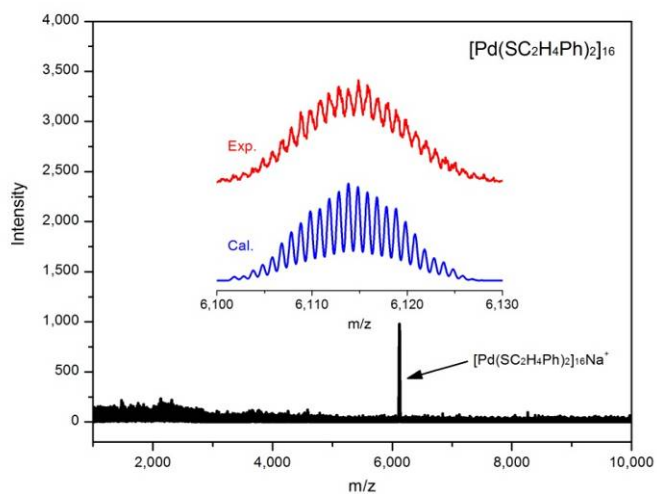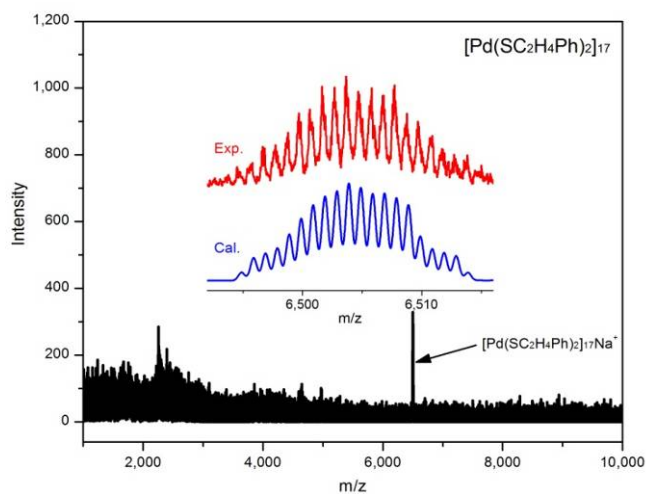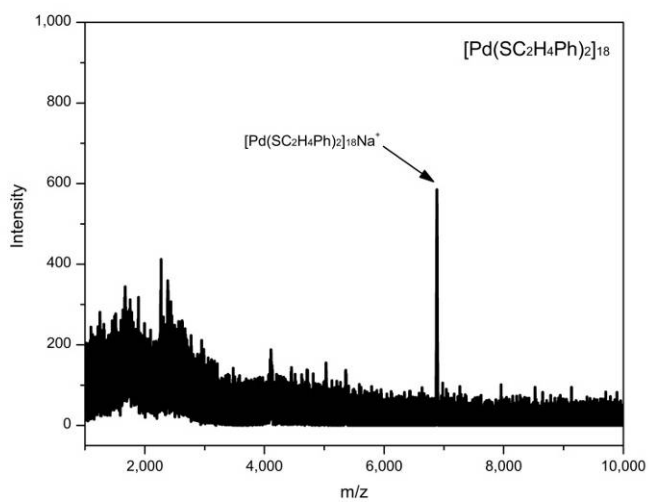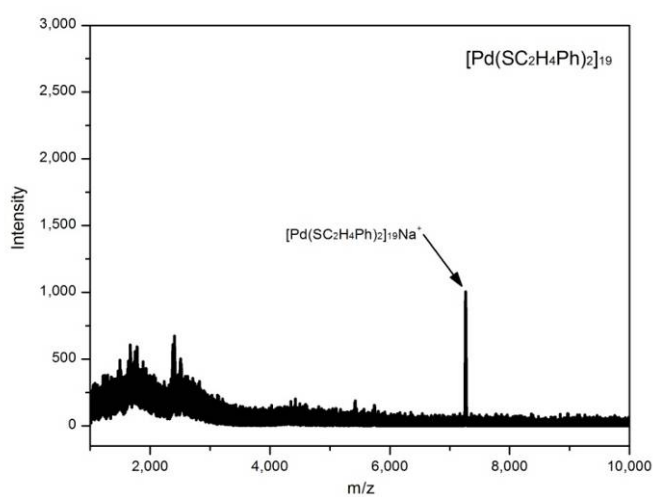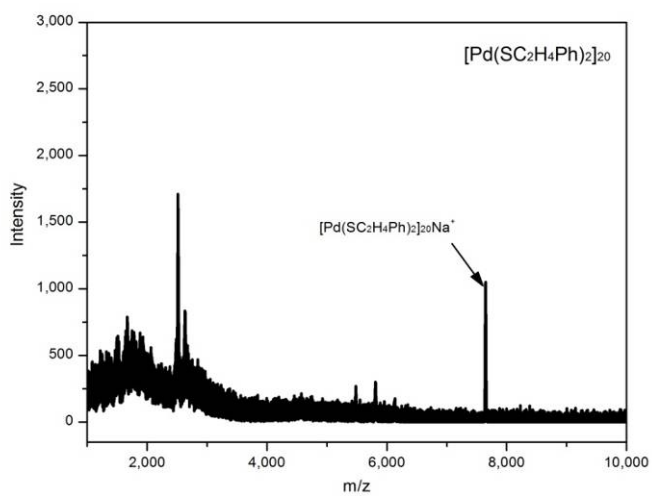

**Figure S1 | MALDI-TOF-MS of  $[\text{Pd}(\text{SC}_2\text{H}_4\text{Ph})_2]_n$  ( $4 \leq n \leq 20$ ). Inset is the isotopic patterns comparison (red: experimental; blue: calculated).**

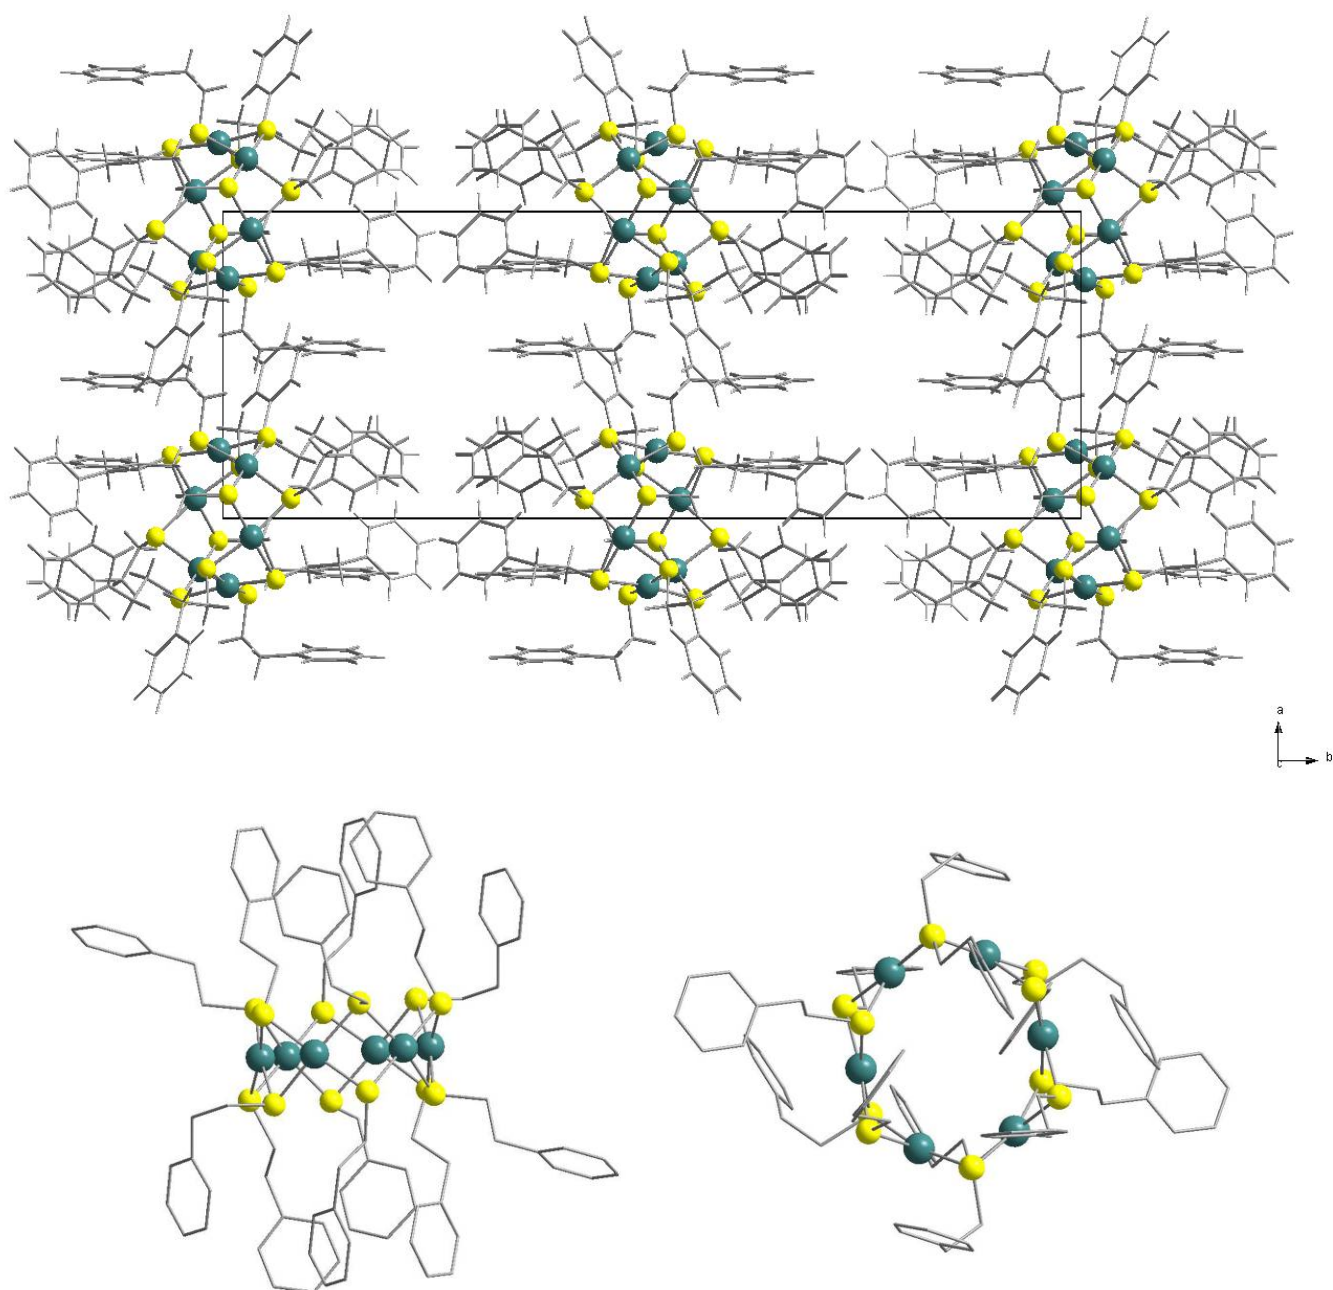

**Figure S2 | The single crystal structure of [Pd(SC<sub>2</sub>H<sub>4</sub>Ph)<sub>2</sub>]<sub>6</sub>. Blue, Pd; yellow, S.**

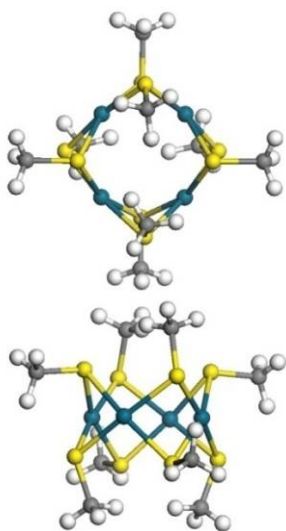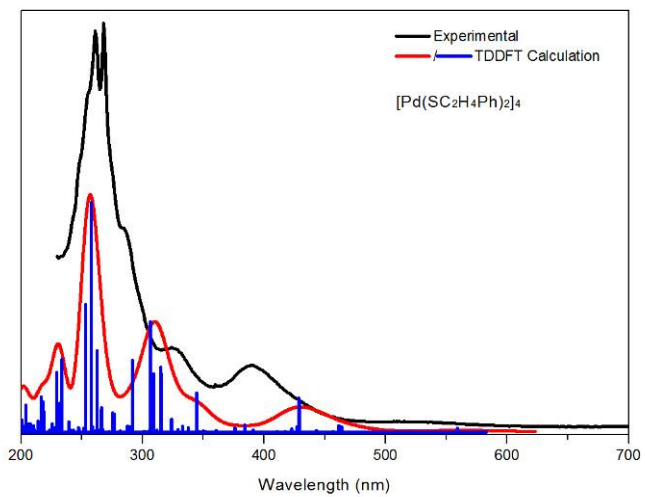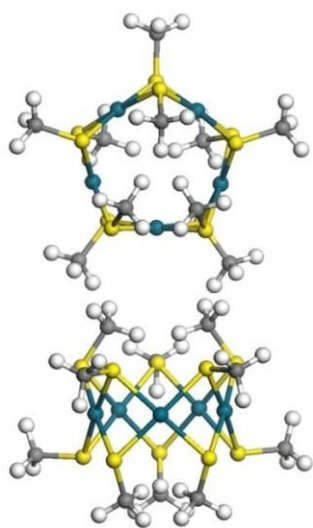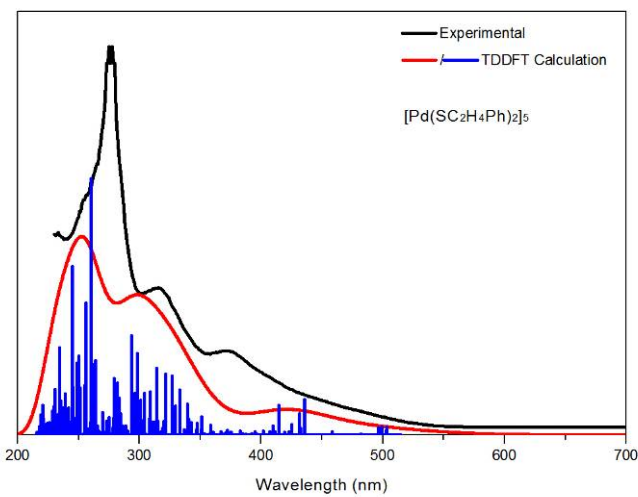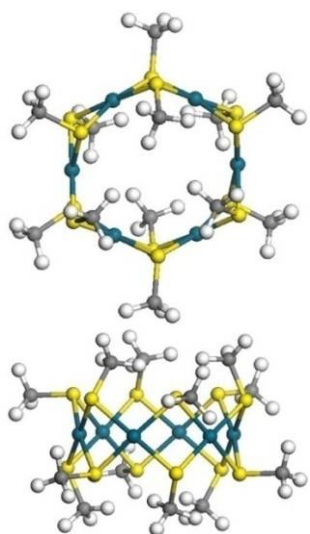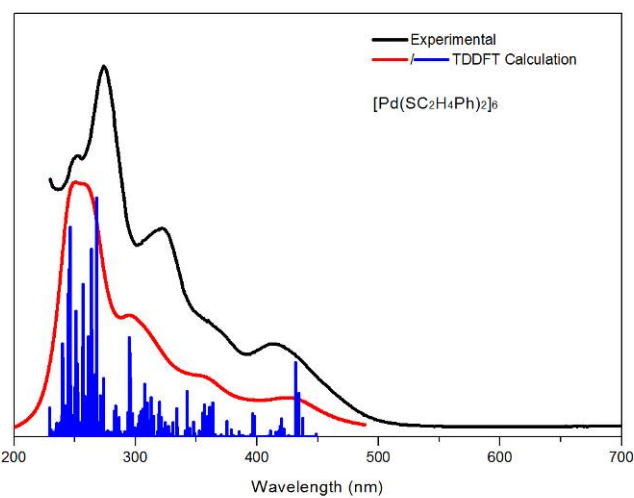



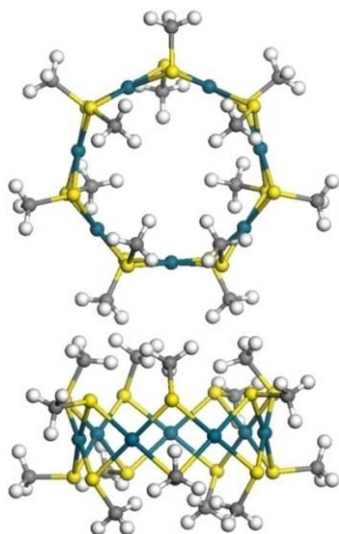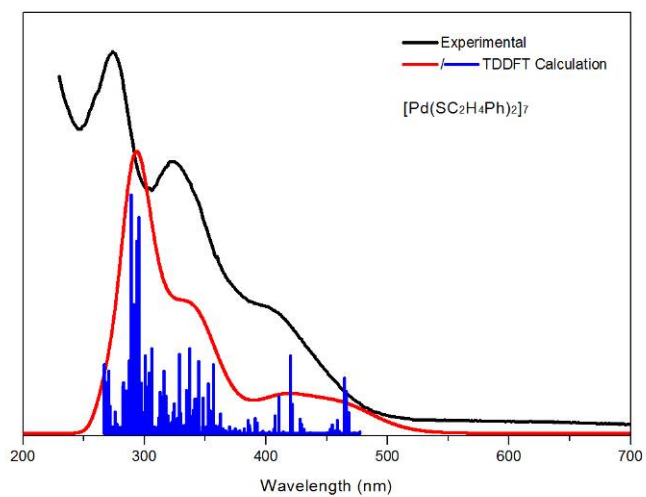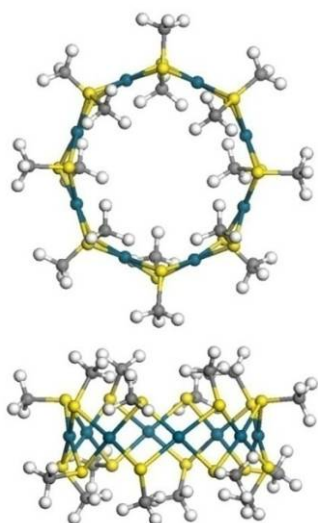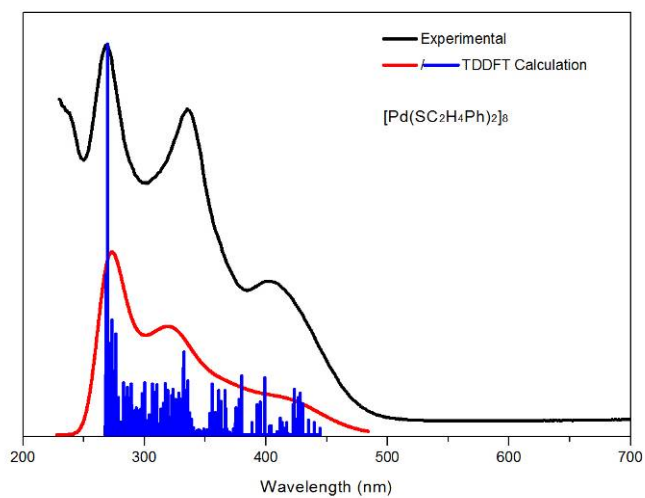

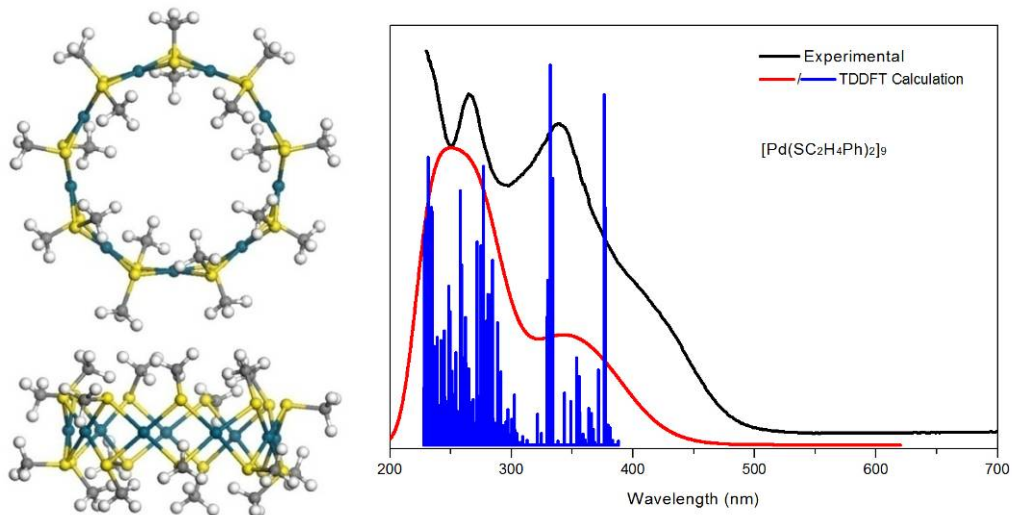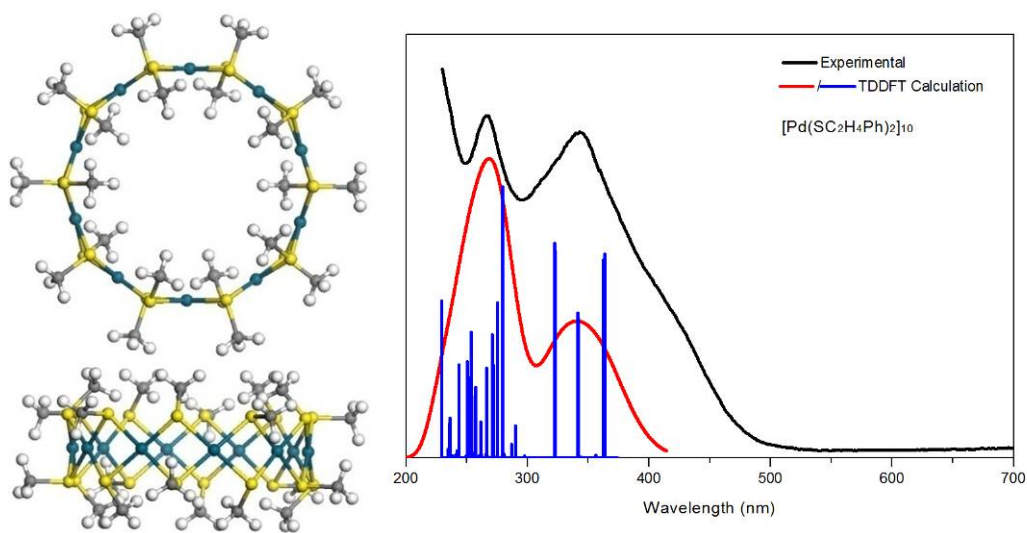

**Figure S3 | Optimized molecular structure and optimized/experimental optical spectra of  $[\text{Pd}(\text{SCH}_3)_2]_n$  ( $4 \leq n \leq 10$ ). Blue, Pd; yellow, S; black, C; gray, H.**

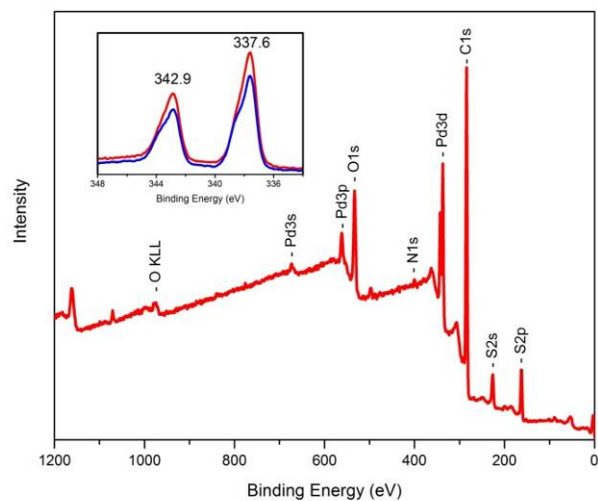

**Figure S4 | XPS spectra of the product when Pd(NO<sub>3</sub>)<sub>2</sub> reacts with 2-phenylethanethiol without (red) or with (blue) the addition of triethylamine.**

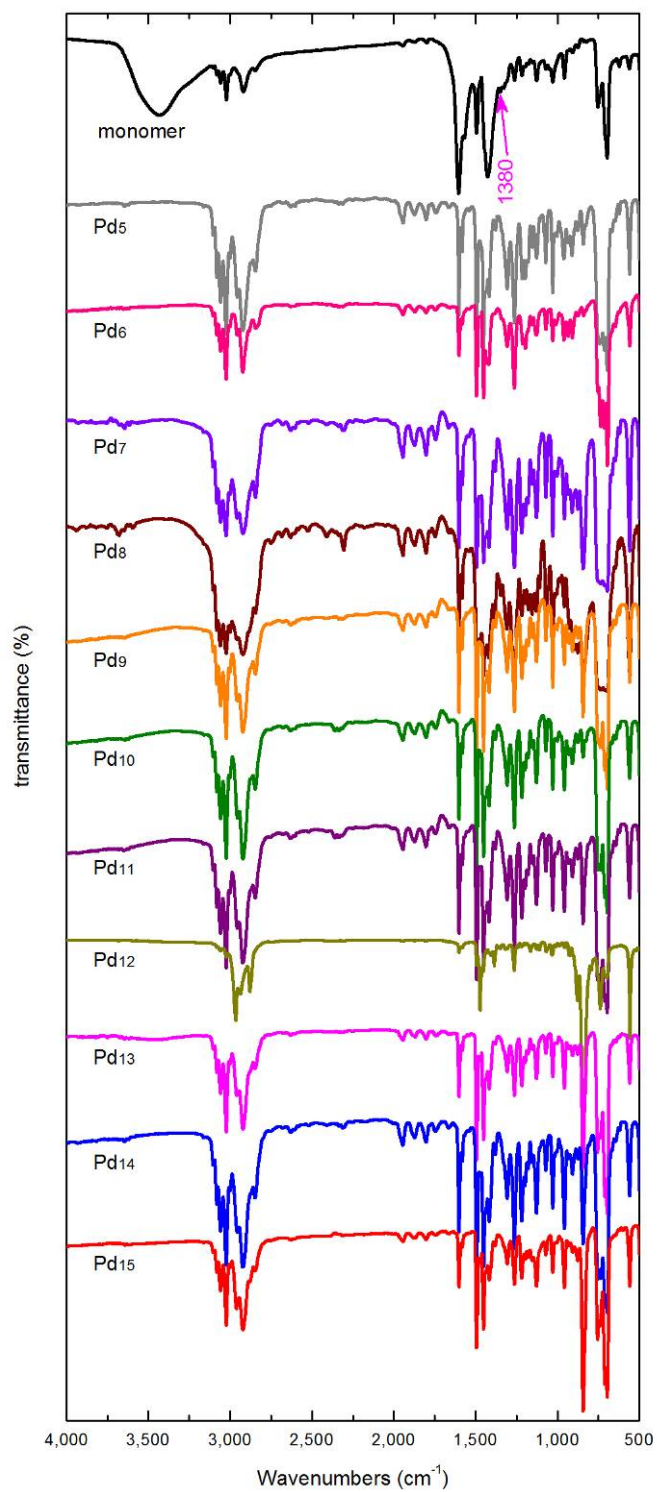

**Figure S5 | FTIR absorption spectra of PdH(SC<sub>2</sub>H<sub>4</sub>Ph)<sub>2</sub>(NO<sub>3</sub>)(H<sub>2</sub>O) monomer and [Pd(SC<sub>2</sub>H<sub>4</sub>Ph)<sub>2</sub>]<sub>n</sub> (5 ≤ n ≤ 15).**

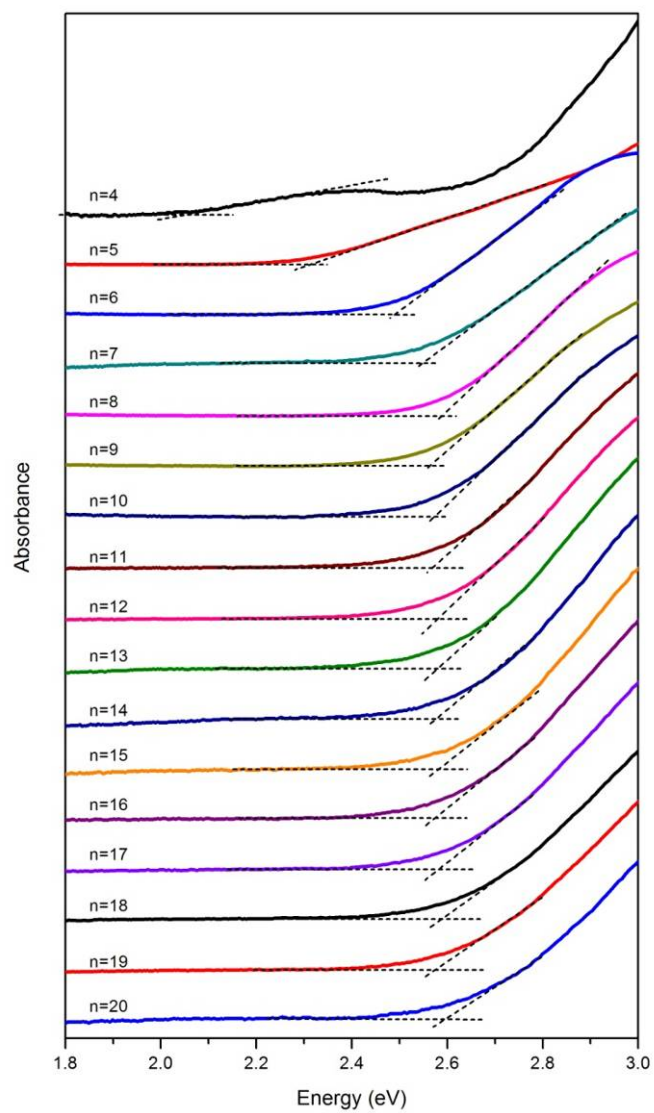

**Figure S6 | Onsets in UV/Vis absorption spectra of  $[\text{Pd}(\text{SC}_2\text{H}_4\text{Ph})_2]_n$  ( $4 \leq n \leq 20$ ).**

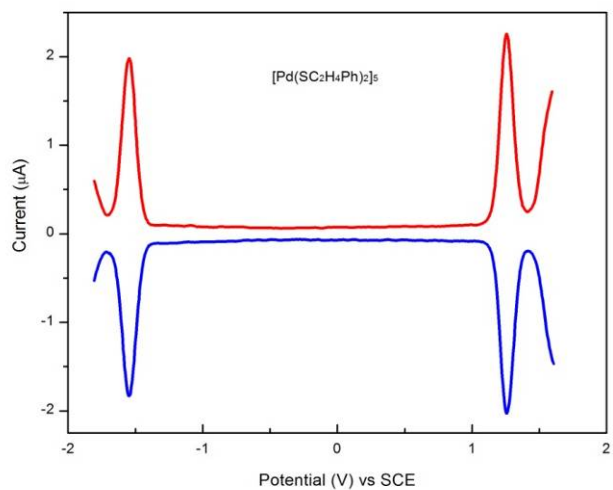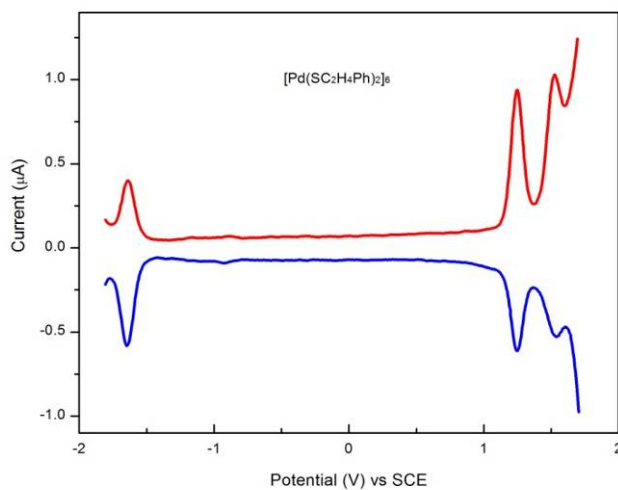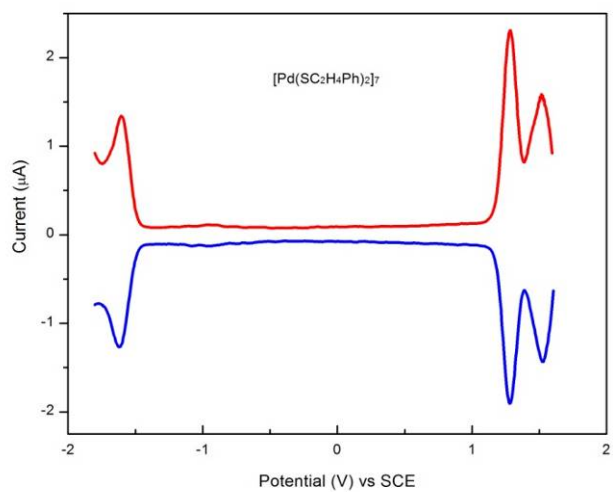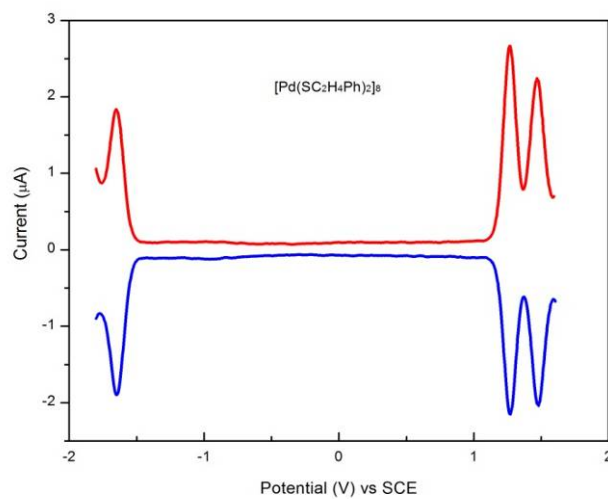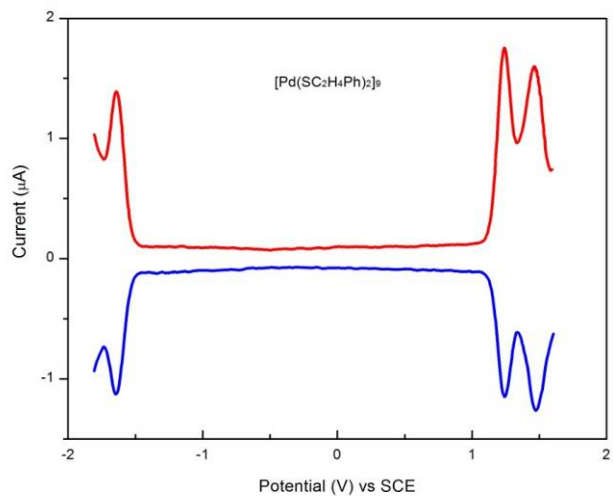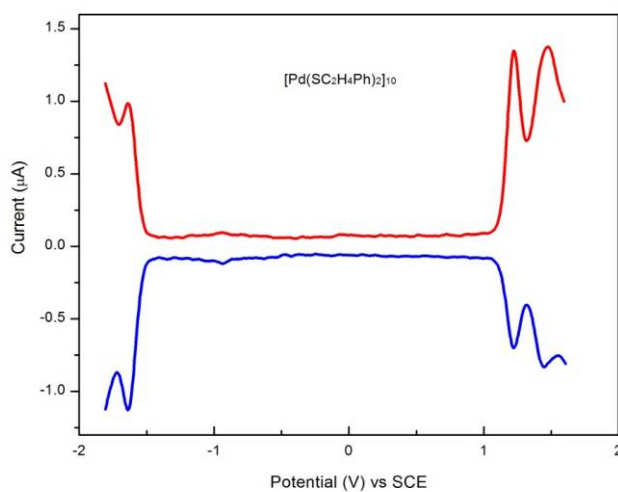

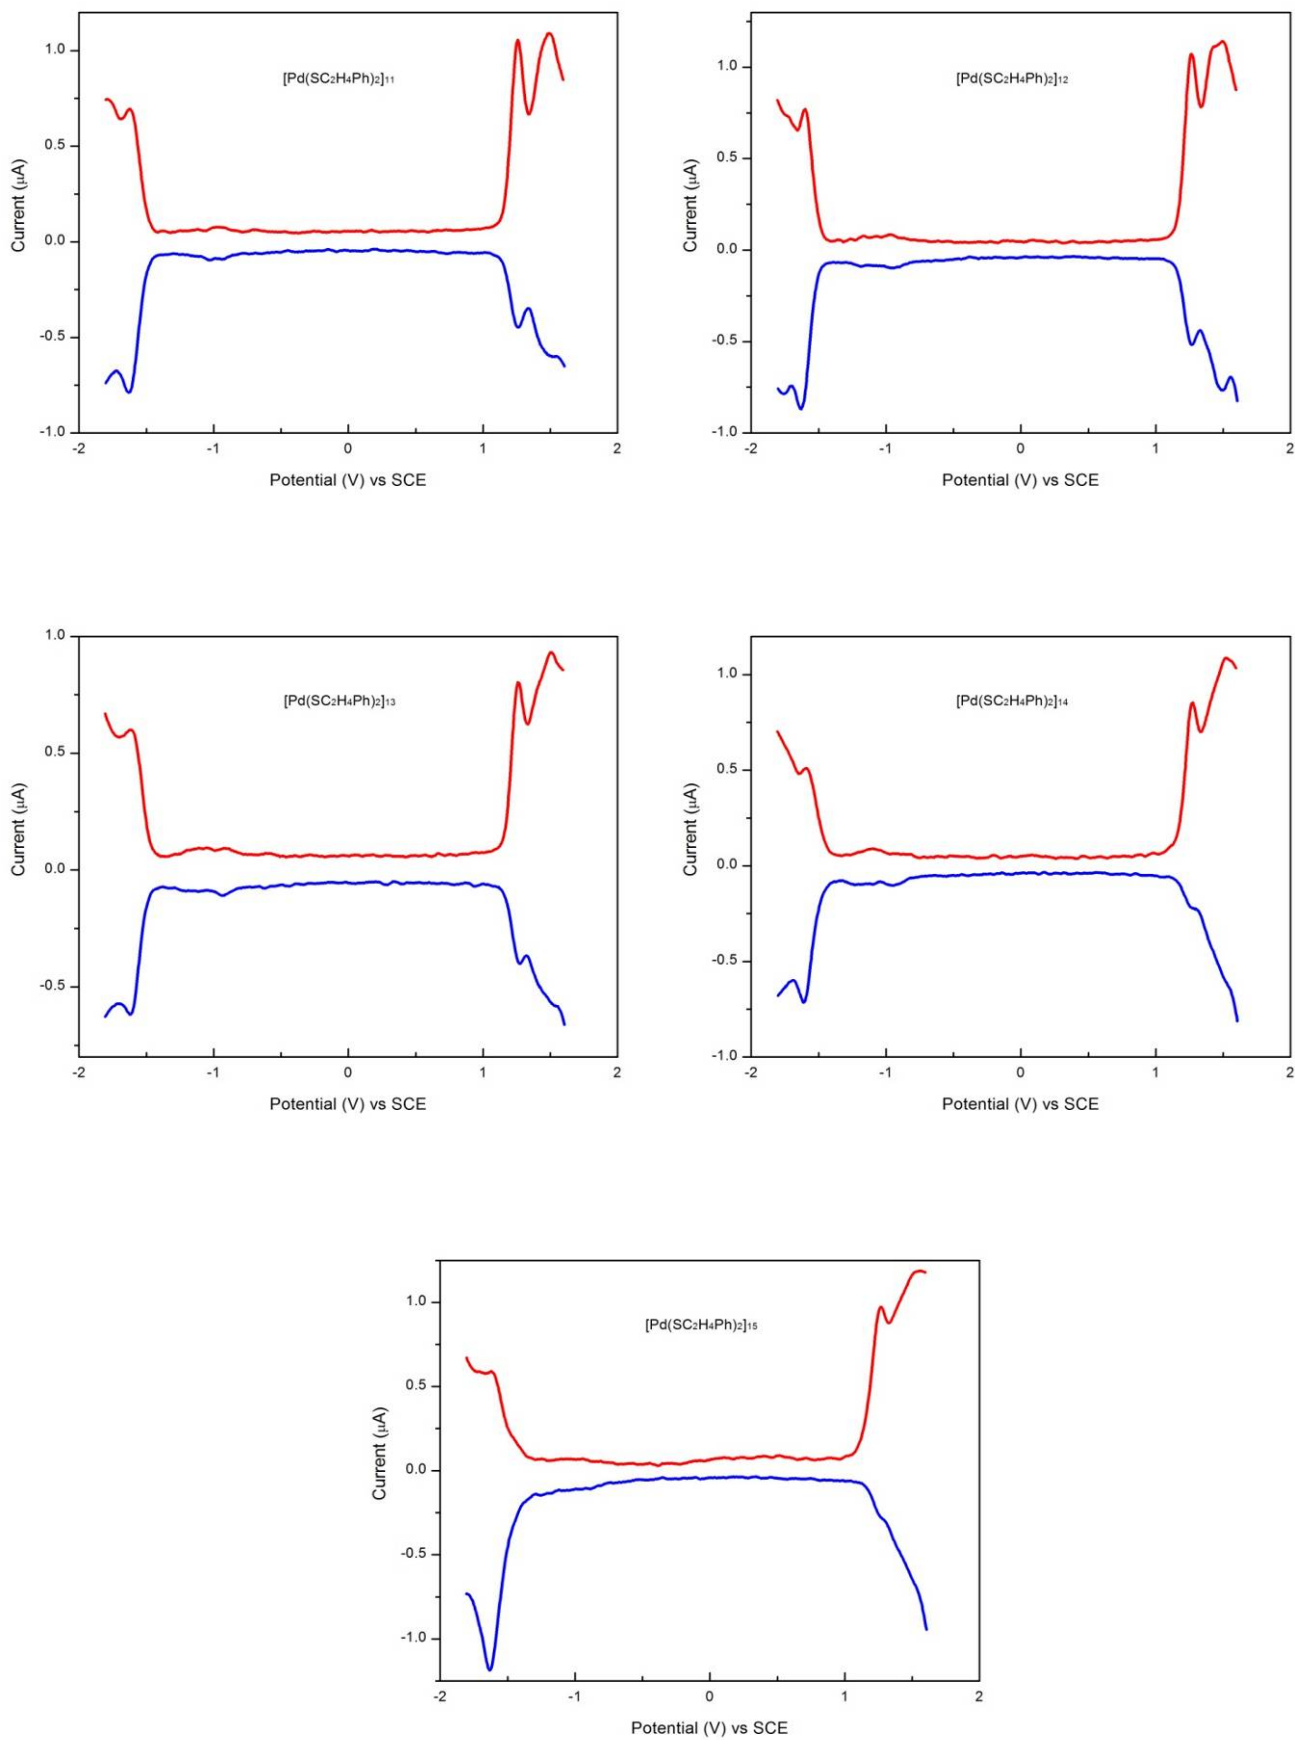

**Figure S7 | Differential pulse voltammetry (DPV) of  $[\text{Pd}(\text{SC}_2\text{H}_4\text{Ph})_2]_n$ , ( $5 \leq n \leq 15$ ).**

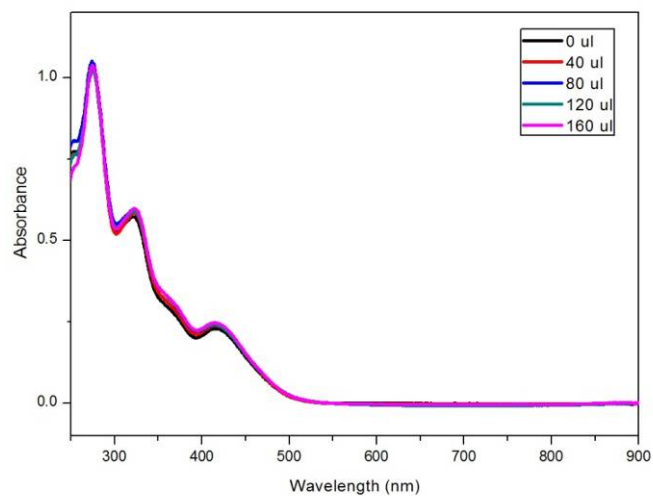

**Figure S8 | UV/Vis absorption spectra of [Pd(SC<sub>2</sub>H<sub>4</sub>Ph)<sub>2</sub>]<sub>6</sub> with the addition of NaBH<sub>4</sub> at room temperature under air atmosphere.** Nanoclusters (0.1 mg, ca.  $0.5 \times 10^{-7}$  mol) was dissolved in 0.8 mL THF, and  $2.5 \times 10^{-2}$  M NaBH<sub>4</sub> aqueous solution (40  $\mu$ L,  $10 \times 10^{-7}$  mol) was added at once for every 15 minutes.



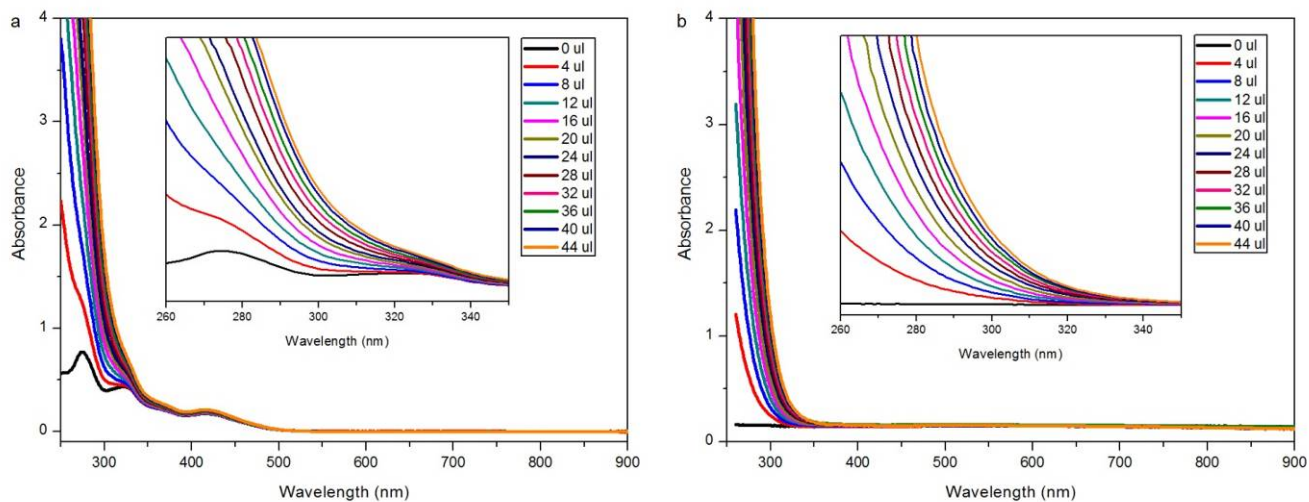

**Figure S9 | UV/Vis absorption spectra of [Pd(SC<sub>2</sub>H<sub>4</sub>Ph)<sub>2</sub>]<sub>6</sub> (a) and pure THF (b) with the addition of H<sub>2</sub>O<sub>2</sub> at room temperature under air atmosphere. Nanoclusters (0.1 mg, about  $5 \times 10^{-5}$  mmol) was dissolved in 0.8 mL THF solution and 4  $\mu$ L H<sub>2</sub>O<sub>2</sub> ( $5.1 \times 10^{-2}$  mmol) aqueous solution was added at once for every 6 minutes.**

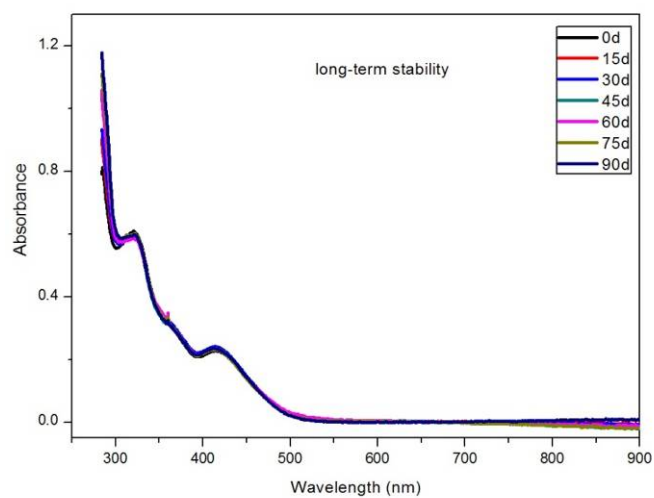

**Figure S10 | UV/Vis absorption spectra of toluene solutions of [Pd(SC<sub>2</sub>H<sub>4</sub>Ph)<sub>2</sub>]<sub>6</sub> at room temperature for different times under air atmosphere.**

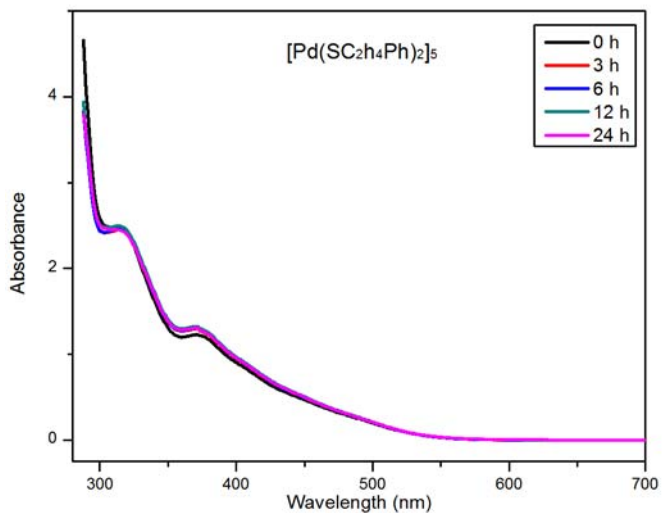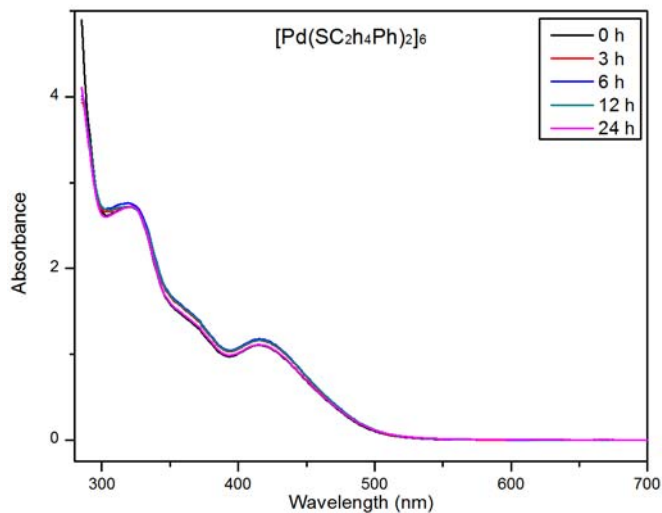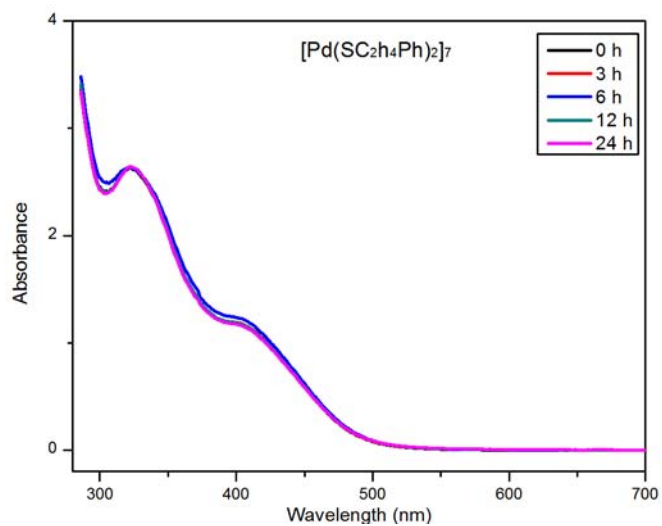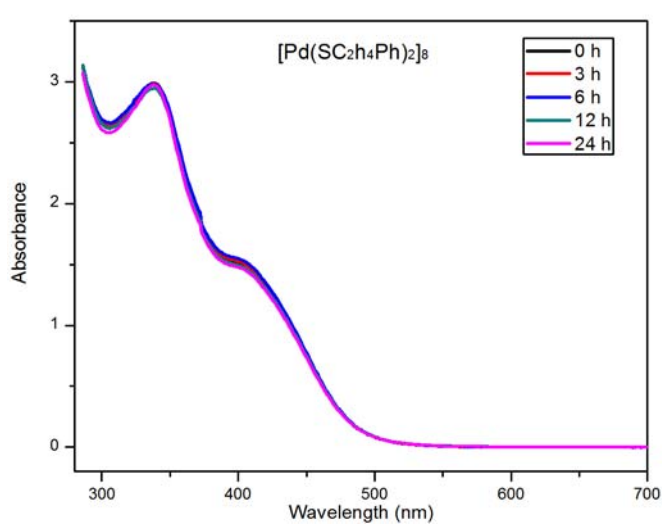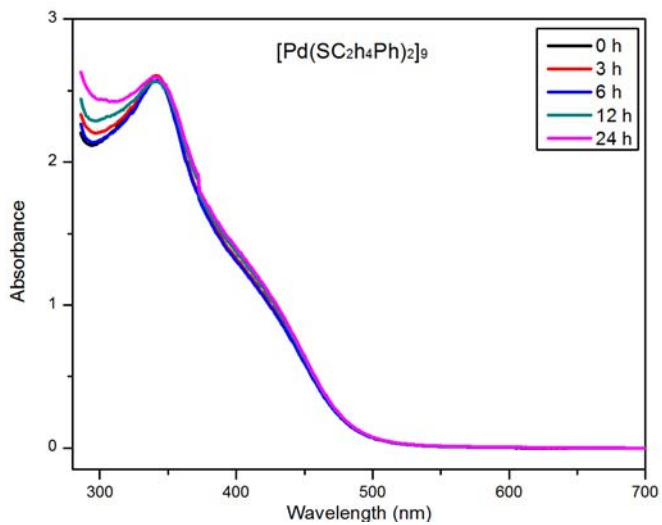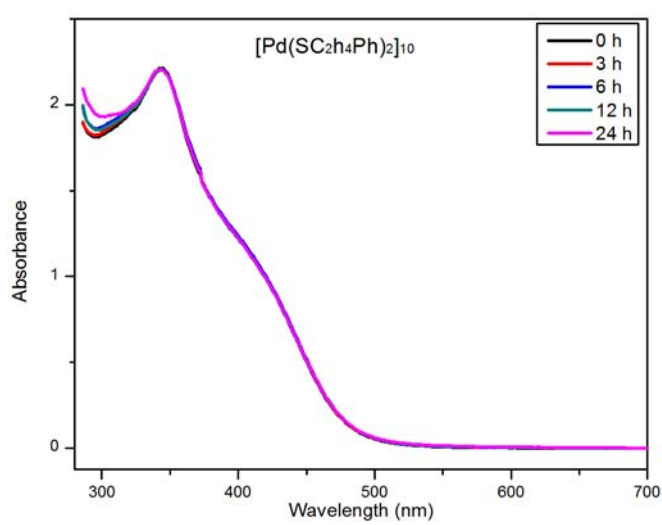

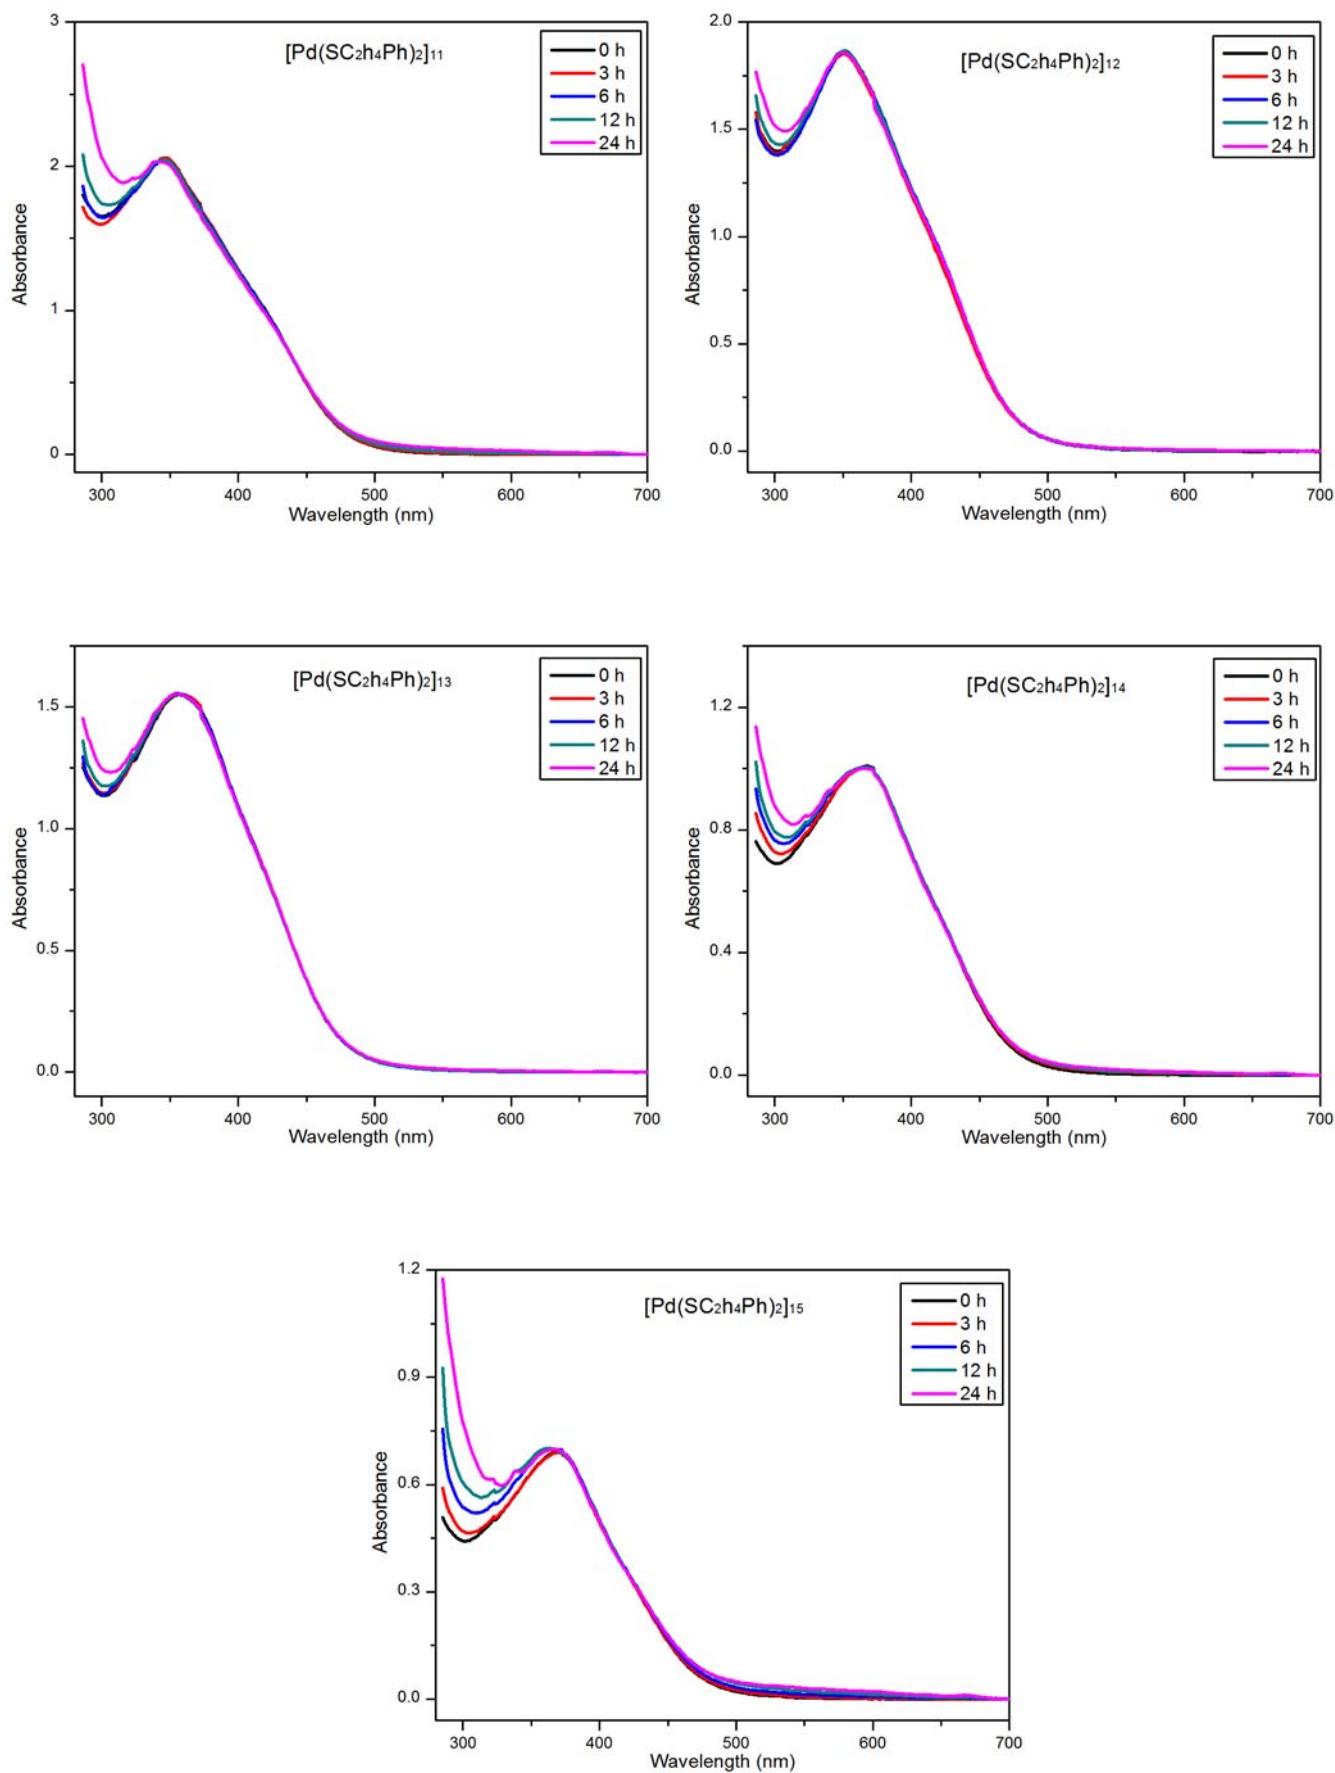

**Figure S11 | UV/Vis absorption spectra of toluene solutions of  $[\text{Pd}(\text{SC}_2\text{H}_4\text{Ph})_2]_n$  at  $80^\circ\text{C}$  for different times under air atmosphere.**

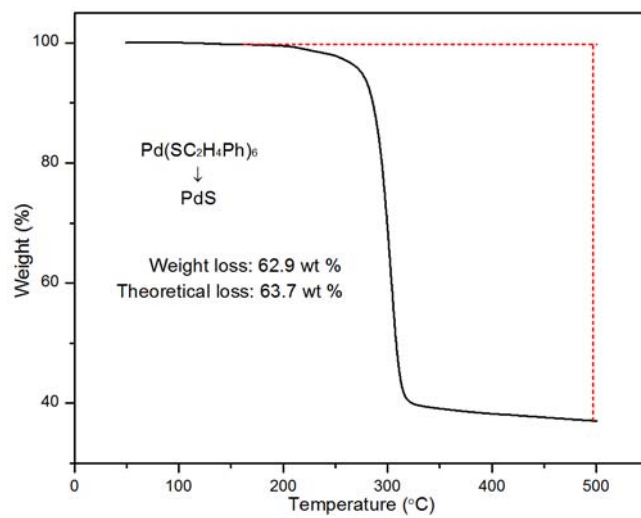

**Figure S12 | TGA of  $[\text{Pd}(\text{SC}_2\text{H}_4\text{Ph})_2]_6$ .**

**Table S1 | Summary of tiara-like [M(SR)<sub>2</sub>]<sub>n</sub> (M = Ni, Pd, Pt) nanoclusters.**

| [Ni(SR) <sub>2</sub> ] <sub>n</sub> |                                                                                                                                                                                                                                                                                                                                                                                                                                                                                                                                                                                                                                                                                                                                                              |
|-------------------------------------|--------------------------------------------------------------------------------------------------------------------------------------------------------------------------------------------------------------------------------------------------------------------------------------------------------------------------------------------------------------------------------------------------------------------------------------------------------------------------------------------------------------------------------------------------------------------------------------------------------------------------------------------------------------------------------------------------------------------------------------------------------------|
| n                                   | SR                                                                                                                                                                                                                                                                                                                                                                                                                                                                                                                                                                                                                                                                                                                                                           |
| 4                                   | <i>Si</i> -Pr <sup>[S11]</sup> , SC <sub>6</sub> H <sub>11</sub> <sup>[S12]</sup> , SC <sub>5</sub> H <sub>9</sub> NMe <sup>[S13]</sup>                                                                                                                                                                                                                                                                                                                                                                                                                                                                                                                                                                                                                      |
| 5                                   | SEt <sup>[S12]</sup> , SC <sub>2</sub> H <sub>4</sub> N( <i>i</i> -Pr) <sub>2</sub> <sup>[S14]</sup> , SCH <sub>2</sub> SiMe <sub>3</sub> <sup>[S15]</sup>                                                                                                                                                                                                                                                                                                                                                                                                                                                                                                                                                                                                   |
| 6                                   | SMe <sup>[S16, S17]</sup> , SEt <sup>[S18, S19]</sup> , <i>Sn</i> -Pr <sup>[S20, S21]</sup> , SEtOH <sup>[S22, S23]</sup> , SCH <sub>2</sub> CH <sub>2</sub> S <sup>[S24]</sup> , (SMe)/( <i>Si</i> -Pr) <sup>[S25]</sup> , (SMe)/( <i>St</i> -Bu) <sup>[S25]</sup> , (SEt)/( <i>Si</i> -Pr) <sup>[S25]</sup> , ( <i>Si</i> -Pr)/( <i>mtet</i> ) <sup>[S26]</sup> , S(CH <sub>2</sub> ) <sub>3</sub> NMe <sub>2</sub> <sup>[S27]</sup> , S(CH <sub>2</sub> ) <sub>3</sub> NHMe <sup>[S28]</sup> , S(CH <sub>2</sub> ) <sub>2</sub> SC <sub>6</sub> H <sub>4</sub> Cl <sup>[S29]</sup> , SCH <sub>2</sub> PhCl <sup>[S30]</sup> , SC <sub>2</sub> H <sub>4</sub> SiMe <sub>3</sub> <sup>[S31]</sup> , SC <sub>2</sub> H <sub>4</sub> Ph <sup>[S32, S33]</sup> |
| 8                                   | SCH <sub>2</sub> COOEt <sup>[S34]</sup>                                                                                                                                                                                                                                                                                                                                                                                                                                                                                                                                                                                                                                                                                                                      |
| 9                                   | SPh <sup>[S35]</sup>                                                                                                                                                                                                                                                                                                                                                                                                                                                                                                                                                                                                                                                                                                                                         |
| 10                                  | (SEt)/( <i>St</i> -Bu) <sup>[S25]</sup> , ( <i>St</i> -Bu)/(pyet) <sup>[S36]</sup> , ( <i>St</i> -Bu)/(atet) <sup>[S36]</sup> , ( <i>St</i> -Bu)/( <i>mtet</i> ) <sup>[S26]</sup>                                                                                                                                                                                                                                                                                                                                                                                                                                                                                                                                                                            |
| 11                                  | SPh <sup>[S35]</sup>                                                                                                                                                                                                                                                                                                                                                                                                                                                                                                                                                                                                                                                                                                                                         |
| 12                                  | ( <i>St</i> -Bu)/(etet) <sup>[S36]</sup>                                                                                                                                                                                                                                                                                                                                                                                                                                                                                                                                                                                                                                                                                                                     |
| [Pd(SR) <sub>2</sub> ] <sub>n</sub> |                                                                                                                                                                                                                                                                                                                                                                                                                                                                                                                                                                                                                                                                                                                                                              |
| n                                   | SR                                                                                                                                                                                                                                                                                                                                                                                                                                                                                                                                                                                                                                                                                                                                                           |
| 6                                   | SEt <sup>[S37]</sup> , <i>Sn</i> -Pr <sup>[S38, S39]</sup> , <i>Sn</i> -Bu <sup>[S40]</sup> , SPh <sup>[S40]</sup> , SHex <sup>[S41]</sup> , SC <sub>12</sub> H <sub>25</sub> <sup>[S42]</sup> , SCH <sub>2</sub> COOMe <sup>[S43]</sup>                                                                                                                                                                                                                                                                                                                                                                                                                                                                                                                     |
| 8                                   | <i>Sn</i> -Pr <sup>[S39]</sup> , SCH <sub>2</sub> COOMe <sup>[S44]</sup>                                                                                                                                                                                                                                                                                                                                                                                                                                                                                                                                                                                                                                                                                     |
| [Pt(SR) <sub>2</sub> ] <sub>n</sub> |                                                                                                                                                                                                                                                                                                                                                                                                                                                                                                                                                                                                                                                                                                                                                              |
| n                                   | SR                                                                                                                                                                                                                                                                                                                                                                                                                                                                                                                                                                                                                                                                                                                                                           |
| 8                                   | SCH <sub>2</sub> COOMe <sup>[S44]</sup>                                                                                                                                                                                                                                                                                                                                                                                                                                                                                                                                                                                                                                                                                                                      |

Notes: (SR<sub>1</sub>)/(SR<sub>2</sub>): in the cluster contains two type thiols with number rate as 1/1;

SCH<sub>2</sub>CH<sub>2</sub>S is for [Ni(SCH<sub>2</sub>CH<sub>2</sub>S)]<sub>6</sub>;

Me=CH<sub>3</sub>;

Et=CH<sub>2</sub>CH<sub>3</sub>;

EtOH=CH<sub>2</sub>CH<sub>2</sub>OH;

*n*-Pr=CH<sub>2</sub>CH<sub>2</sub>CH<sub>3</sub>;

*i*-Pr=CH(CH<sub>3</sub>)<sub>2</sub>;

*t*-Bu=C(CH<sub>3</sub>)<sub>3</sub>;

Hex=(CH<sub>2</sub>)<sub>5</sub>CH<sub>3</sub>;

pyet=2-(2-mercaptoethyl)pyridine;

atet=2-aminoethanethiol;

mtet =methylthioethanethiolate;

etet=2-ethylthioethanethiolate.

**Table S2 | Summary of differential pulse voltammetry (DPV) and UV/vis absorption results of [Pd(SC<sub>2</sub>H<sub>4</sub>Ph)<sub>2</sub>]<sub>n</sub> (5 ≤ n ≤ 15).**

| n value | The first reduction potential (V) | The first oxidation potential (V) | Electrochemical gap (V) | UV onset (eV) |
|---------|-----------------------------------|-----------------------------------|-------------------------|---------------|
|         |                                   |                                   |                         | 2.06          |
| 5       | -1.536                            | 1.257                             | 2.793                   | 2.32          |
| 6       | -1.643                            | 1.248                             | 2.891                   | 2.49          |
| 7       | -1.62                             | 1.275                             | 2.895                   | 2.55          |
| 8       | -1.656                            | 1.275                             | 2.931                   | 2.59          |
| 9       | -1.635                            | 1.244                             | 2.879                   | 2.56          |
| 10      | -1.643                            | 1.225                             | 2.868                   | 2.57          |
| 11      | -1.627                            | 1.262                             | 2.889                   | 2.57          |
| 12      | -1.61                             | 1.272                             | 2.882                   | 2.58          |
| 13      | -1.625                            | 1.255                             | 2.88                    | 2.58          |
| 14      | -1.595                            | 1.272                             | 2.867                   | 2.58          |
| 15      | -1.621                            | 1.267                             | 2.888                   | 2.58          |

**Table S3 | Crystal data and structure refinement for [Pd(SC<sub>2</sub>H<sub>4</sub>Ph)<sub>2</sub>]<sub>6</sub>.**

|                                            |                                                                   |                   |
|--------------------------------------------|-------------------------------------------------------------------|-------------------|
| <b>Empirical formula</b>                   | C <sub>108</sub> H <sub>117</sub> Pd <sub>6</sub> S <sub>12</sub> |                   |
| <b>Formula weight</b>                      | 2438.13                                                           |                   |
| <b>Temperature</b>                         | 296(2) K                                                          |                   |
| <b>Wavelength</b>                          | 0.71073 Å                                                         |                   |
| <b>Crystal system</b>                      | Monoclinic                                                        |                   |
| <b>Space group</b>                         | P 21/c                                                            |                   |
| <b>Unit cell dimensions</b>                | a = 12.8908(7) Å                                                  | α = 90°.          |
|                                            | b = 35.953(2) Å                                                   | β = 90.3070(10)°. |
|                                            | c = 11.2655(6) Å                                                  | γ = 90°.          |
| <b>Volume</b>                              | 5221.0(5) Å <sup>3</sup>                                          |                   |
| <b>Z</b>                                   | 2                                                                 |                   |
| <b>Density (calculated)</b>                | 1.551 Mg/m <sup>3</sup>                                           |                   |
| <b>Absorption coefficient</b>              | 1.297 mm <sup>-1</sup>                                            |                   |
| <b>F(000)</b>                              | 2466                                                              |                   |
| <b>Crystal size</b>                        | 0.220 × 0.120 × 0.120 mm <sup>3</sup>                             |                   |
| <b>Theta range for data collection</b>     | 1.133 to 26.009°.                                                 |                   |
| <b>Index ranges</b>                        | -15 ≤ h ≤ 15, -28 ≤ k ≤ 44, -13 ≤ l ≤ 13                          |                   |
| <b>Reflections collected</b>               | 27160                                                             |                   |
| <b>Independent reflections</b>             | 10182 [R(int) = 0.0311]                                           |                   |
| <b>Completeness to theta = 25.242°</b>     | 99.3 %                                                            |                   |
| <b>Absorption correction</b>               | None                                                              |                   |
| <b>Refinement method</b>                   | Full-matrix least-squares on F <sup>2</sup>                       |                   |
| <b>Data / restraints / parameters</b>      | 10182 / 0 / 556                                                   |                   |
| <b>Goodness-of-fit on F<sup>2</sup></b>    | 1.111                                                             |                   |
| <b>Final R indices [I &gt; 2 sigma(I)]</b> | R1 = 0.0363, wR2 = 0.0998                                         |                   |
| <b>R indices (all data)</b>                | R1 = 0.0472, wR2 = 0.1183                                         |                   |
| <b>Extinction coefficient</b>              | 0.00134(10)                                                       |                   |
| <b>Largest diff. peak and hole</b>         | 1.556 and -0.882 e.Å <sup>-3</sup>                                |                   |



**Table S4 | Atomic coordinates ( $\times 10^4$ ) and equivalent isotropic displacement parameters ( $\text{\AA}^2 \times 10^3$ ) for  $[\text{Pd}(\text{SC}_2\text{H}_4\text{Ph})_2]_6$ .  $U(\text{eq})$  is defined as one third of the trace of the orthogonalized  $U^{ij}$  tensor.**

|       | x        | y        | z       | $U(\text{eq})$ |
|-------|----------|----------|---------|----------------|
| Pd(1) | 7792(1)  | 51(1)    | 4423(1) | 15(1)          |
| Pd(2) | 9365(1)  | 328(1)   | 2450(1) | 14(1)          |
| Pd(3) | 11677(1) | 272(1)   | 3063(1) | 14(1)          |
| S(1)  | 7505(1)  | 284(1)   | 6331(1) | 16(1)          |
| S(2)  | 7984(1)  | 611(1)   | 3413(1) | 17(1)          |
| S(3)  | 10616(1) | 788(1)   | 2760(1) | 17(1)          |
| S(4)  | 7390(1)  | -508(1)  | 5352(1) | 16(1)          |
| S(5)  | 8314(1)  | -195(1)  | 2611(1) | 16(1)          |
| S(6)  | 10732(1) | 58(1)    | 1433(1) | 16(1)          |
| C(1)  | 6110(3)  | 221(1)   | 6493(4) | 22(1)          |
| C(2)  | 5479(3)  | 433(1)   | 5569(4) | 24(1)          |
| C(3)  | 5555(3)  | 851(1)   | 5562(4) | 23(1)          |
| C(4)  | 5733(4)  | 1054(2)  | 6575(5) | 30(1)          |
| C(5)  | 5701(4)  | 1443(2)  | 6572(5) | 39(1)          |
| C(6)  | 5511(4)  | 1630(2)  | 5534(6) | 44(2)          |
| C(7)  | 5374(4)  | 1434(2)  | 4498(6) | 45(2)          |
| C(8)  | 5391(4)  | 1049(2)  | 4516(5) | 32(1)          |
| C(9)  | 8403(4)  | 985(1)   | 4411(4) | 22(1)          |
| C(10) | 8486(4)  | 1352(1)  | 3733(4) | 25(1)          |
| C(11) | 8736(4)  | 1677(1)  | 4543(4) | 23(1)          |
| C(12) | 8008(4)  | 1948(1)  | 4767(5) | 33(1)          |
| C(13) | 8223(5)  | 2248(2)  | 5514(6) | 44(2)          |
| C(14) | 9186(6)  | 2272(2)  | 6035(5) | 49(2)          |
| C(15) | 9928(5)  | 2004(2)  | 5840(6) | 48(2)          |
| C(16) | 9694(4)  | 1708(2)  | 5094(5) | 34(1)          |
| C(17) | 10965(3) | 978(1)   | 1311(4) | 22(1)          |
| C(18) | 12006(4) | 1182(1)  | 1362(4) | 26(1)          |
| C(19) | 12034(4) | 1499(1)  | 2236(4) | 26(1)          |
| C(20) | 12782(4) | 1509(2)  | 3134(5) | 31(1)          |
| C(21) | 12794(5) | 1800(2)  | 3948(5) | 40(1)          |
| C(22) | 12077(5) | 2087(2)  | 3878(5) | 42(1)          |
| C(23) | 11345(5) | 2081(2)  | 2986(6) | 45(2)          |
| C(24) | 11324(4) | 1794(2)  | 2173(5) | 37(1)          |
| C(25) | 8030(3)  | -893(1)  | 4612(4) | 19(1)          |
| C(26) | 7302(4)  | -1053(1) | 3660(4) | 23(1)          |
| C(27) | 7783(4)  | -1339(1) | 2861(4) | 21(1)          |

|        |          |          |          |       |
|--------|----------|----------|----------|-------|
| C(28)  | 7293(4)  | -1675(2) | 2679(5)  | 33(1) |
| C(29)  | 7712(5)  | -1939(2) | 1907(5)  | 43(2) |
| C(30)  | 8642(4)  | -1867(2) | 1325(5)  | 34(1) |
| C(31)  | 9119(4)  | -1530(2) | 1509(4)  | 30(1) |
| C(32)  | 8699(4)  | -1271(1) | 2266(4)  | 25(1) |
| C(33)  | 7138(3)  | -177(1)  | 1684(4)  | 20(1) |
| C(34)  | 7229(3)  | -463(1)  | 678(4)   | 21(1) |
| C(35)  | 6188(3)  | -549(1)  | 108(4)   | 22(1) |
| C(36)  | 5888(4)  | -390(2)  | -959(4)  | 29(1) |
| C(37)  | 4947(4)  | -470(2)  | -1481(4) | 31(1) |
| C(38)  | 4278(4)  | -716(2)  | -943(5)  | 35(1) |
| C(39)  | 4555(4)  | -874(2)  | 146(5)   | 42(2) |
| C(40)  | 5501(4)  | -791(2)  | 643(5)   | 39(1) |
| C(41)  | 10697(3) | -448(1)  | 1414(4)  | 19(1) |
| C(42)  | 11666(3) | -590(1)  | 752(4)   | 18(1) |
| C(43)  | 11722(3) | -1011(1) | 762(4)   | 20(1) |
| C(44)  | 11634(4) | -1216(1) | -281(4)  | 26(1) |
| C(45)  | 11664(4) | -1601(2) | -258(5)  | 34(1) |
| C(46)  | 11783(4) | -1787(2) | 804(6)   | 39(1) |
| C(47)  | 11897(4) | -1589(2) | 1836(5)  | 38(1) |
| C(48)  | 11860(4) | -1203(1) | 1824(4)  | 27(1) |
| C(49)  | 5968(7)  | 2963(3)  | 6610(8)  | 73(2) |
| C(50)  | 4792(14) | 2959(5)  | 6190(16) | 74(5) |
| C(51)  | 4416(8)  | 2642(3)  | 6888(9)  | 87(3) |
| C(52)  | 4980(16) | 2466(6)  | 7821(19) | 95(6) |
| C(53)  | 5981(10) | 2467(4)  | 8039(11) | 47(3) |
| C(54)  | 6432(15) | 2778(5)  | 7301(16) | 76(5) |
| C(49') | 5968(7)  | 2963(3)  | 6610(8)  | 73(2) |
| C(50') | 5533(11) | 2646(4)  | 7273(13) | 55(4) |
| C(51') | 4416(8)  | 2642(3)  | 6888(9)  | 87(3) |
| C(52') | 4000(15) | 2893(5)  | 5945(16) | 74(5) |
| C(53') | 4414(10) | 3162(4)  | 5497(12) | 50(4) |
| C(54') | 5555(13) | 3184(5)  | 5942(15) | 73(5) |

---

**Table S5 | Bond lengths [Å] and angles [°] for [Pd(SC<sub>2</sub>H<sub>4</sub>Ph)<sub>2</sub>]<sub>6</sub>.**

|               |            |             |           |
|---------------|------------|-------------|-----------|
| Pd(1)-S(2)    | 2.3252(11) | C(14)-C(15) | 1.376(9)  |
| Pd(1)-S(4)    | 2.3252(11) | C(15)-C(16) | 1.388(8)  |
| Pd(1)-S(5)    | 2.3278(11) | C(17)-C(18) | 1.530(6)  |
| Pd(1)-S(1)    | 2.3385(11) | C(18)-C(19) | 1.504(7)  |
| Pd(1)-Pd(3)#1 | 3.1342(5)  | C(19)-C(20) | 1.394(7)  |
| Pd(1)-Pd(2)   | 3.1765(5)  | C(19)-C(24) | 1.402(7)  |
| Pd(2)-S(6)    | 2.3201(11) | C(20)-C(21) | 1.390(8)  |
| Pd(2)-S(2)    | 2.3235(11) | C(21)-C(22) | 1.389(8)  |
| Pd(2)-S(5)    | 2.3277(11) | C(22)-C(23) | 1.376(8)  |
| Pd(2)-S(3)    | 2.3335(11) | C(23)-C(24) | 1.381(8)  |
| Pd(2)-Pd(3)   | 3.0618(5)  | C(25)-C(26) | 1.533(6)  |
| Pd(3)-S(4)#1  | 2.3090(10) | C(26)-C(27) | 1.503(6)  |
| Pd(3)-S(6)    | 2.3281(11) | C(27)-C(28) | 1.378(7)  |
| Pd(3)-S(3)    | 2.3288(11) | C(27)-C(32) | 1.383(7)  |
| Pd(3)-S(1)#1  | 2.3587(11) | C(28)-C(29) | 1.398(7)  |
| Pd(3)-Pd(1)#1 | 3.1342(5)  | C(29)-C(30) | 1.394(8)  |
| S(1)-C(1)     | 1.823(4)   | C(30)-C(31) | 1.374(7)  |
| S(1)-Pd(3)#1  | 2.3588(11) | C(31)-C(32) | 1.375(7)  |
| S(2)-C(9)     | 1.833(4)   | C(33)-C(34) | 1.534(6)  |
| S(3)-C(17)    | 1.829(5)   | C(34)-C(35) | 1.516(6)  |
| S(4)-C(25)    | 1.817(5)   | C(35)-C(40) | 1.383(7)  |
| S(4)-Pd(3)#1  | 2.3090(10) | C(35)-C(36) | 1.385(7)  |
| S(5)-C(33)    | 1.837(4)   | C(36)-C(37) | 1.377(7)  |
| S(6)-C(41)    | 1.821(5)   | C(37)-C(38) | 1.378(8)  |
| C(1)-C(2)     | 1.522(6)   | C(38)-C(39) | 1.396(7)  |
| C(2)-C(3)     | 1.507(7)   | C(39)-C(40) | 1.372(7)  |
| C(3)-C(4)     | 1.372(7)   | C(41)-C(42) | 1.544(6)  |
| C(3)-C(8)     | 1.392(7)   | C(42)-C(43) | 1.518(6)  |
| C(4)-C(5)     | 1.398(8)   | C(43)-C(44) | 1.390(6)  |
| C(5)-C(6)     | 1.371(9)   | C(43)-C(48) | 1.392(7)  |
| C(6)-C(7)     | 1.374(9)   | C(44)-C(45) | 1.384(7)  |
| C(7)-C(8)     | 1.385(8)   | C(45)-C(46) | 1.379(8)  |
| C(9)-C(10)    | 1.528(7)   | C(46)-C(47) | 1.370(8)  |
| C(10)-C(11)   | 1.516(7)   | C(47)-C(48) | 1.390(7)  |
| C(11)-C(12)   | 1.376(7)   | C(49)-C(54) | 1.183(18) |
| C(11)-C(16)   | 1.384(7)   | C(49)-C(50) | 1.59(2)   |
| C(12)-C(13)   | 1.396(8)   | C(50)-C(51) | 1.47(2)   |
| C(13)-C(14)   | 1.374(9)   | C(51)-C(52) | 1.42(2)   |

|                     |             |                      |             |
|---------------------|-------------|----------------------|-------------|
| C(52)-C(53)         | 1.31(2)     | S(3)-Pd(3)-S(1)#1    | 168.13(4)   |
| C(53)-C(54)         | 1.51(2)     | S(4)#1-Pd(3)-Pd(2)   | 130.72(3)   |
| C(52')-C(53')       | 1.22(2)     | S(6)-Pd(3)-Pd(2)     | 48.69(3)    |
| C(53')-C(54')       | 1.55(2)     | S(3)-Pd(3)-Pd(2)     | 49.02(3)    |
|                     |             | S(1)#1-Pd(3)-Pd(2)   | 123.69(3)   |
| S(2)-Pd(1)-S(4)     | 172.99(4)   | S(4)#1-Pd(3)-Pd(1)#1 | 47.67(3)    |
| S(2)-Pd(1)-S(5)     | 82.46(4)    | S(6)-Pd(3)-Pd(1)#1   | 134.55(3)   |
| S(4)-Pd(1)-S(5)     | 97.57(4)    | S(3)-Pd(3)-Pd(1)#1   | 123.58(3)   |
| S(2)-Pd(1)-S(1)     | 99.09(4)    | S(1)#1-Pd(3)-Pd(1)#1 | 47.87(3)    |
| S(4)-Pd(1)-S(1)     | 81.86(4)    | Pd(2)-Pd(3)-Pd(1)#1  | 115.855(13) |
| S(5)-Pd(1)-S(1)     | 172.00(4)   | C(1)-S(1)-Pd(1)      | 102.06(16)  |
| S(2)-Pd(1)-Pd(3)#1  | 137.69(3)   | C(1)-S(1)-Pd(3)#1    | 107.82(16)  |
| S(4)-Pd(1)-Pd(3)#1  | 47.22(3)    | Pd(1)-S(1)-Pd(3)#1   | 83.71(4)    |
| S(5)-Pd(1)-Pd(3)#1  | 126.04(3)   | C(9)-S(2)-Pd(2)      | 112.51(15)  |
| S(1)-Pd(1)-Pd(3)#1  | 48.42(3)    | C(9)-S(2)-Pd(1)      | 111.56(15)  |
| S(2)-Pd(1)-Pd(2)    | 46.88(3)    | Pd(2)-S(2)-Pd(1)     | 86.20(4)    |
| S(4)-Pd(1)-Pd(2)    | 136.92(3)   | C(17)-S(3)-Pd(3)     | 106.36(16)  |
| S(5)-Pd(1)-Pd(2)    | 46.97(3)    | C(17)-S(3)-Pd(2)     | 107.74(15)  |
| S(1)-Pd(1)-Pd(2)    | 129.47(3)   | Pd(3)-S(3)-Pd(2)     | 82.10(4)    |
| Pd(3)#1-Pd(1)-Pd(2) | 127.672(13) | C(25)-S(4)-Pd(3)#1   | 113.51(14)  |
| S(6)-Pd(2)-S(2)     | 178.07(4)   | C(25)-S(4)-Pd(1)     | 110.49(15)  |
| S(6)-Pd(2)-S(5)     | 98.28(4)    | Pd(3)#1-S(4)-Pd(1)   | 85.11(4)    |
| S(2)-Pd(2)-S(5)     | 82.50(4)    | C(33)-S(5)-Pd(2)     | 113.95(16)  |
| S(6)-Pd(2)-S(3)     | 81.03(4)    | C(33)-S(5)-Pd(1)     | 104.06(15)  |
| S(2)-Pd(2)-S(3)     | 98.69(4)    | Pd(2)-S(5)-Pd(1)     | 86.05(4)    |
| S(5)-Pd(2)-S(3)     | 164.43(4)   | C(41)-S(6)-Pd(2)     | 113.90(15)  |
| S(6)-Pd(2)-Pd(3)    | 48.91(3)    | C(41)-S(6)-Pd(3)     | 110.61(15)  |
| S(2)-Pd(2)-Pd(3)    | 132.14(3)   | Pd(2)-S(6)-Pd(3)     | 82.40(4)    |
| S(5)-Pd(2)-Pd(3)    | 119.68(3)   | C(2)-C(1)-S(1)       | 113.1(3)    |
| S(3)-Pd(2)-Pd(3)    | 48.88(3)    | C(3)-C(2)-C(1)       | 118.0(4)    |
| S(6)-Pd(2)-Pd(1)    | 134.73(3)   | C(4)-C(3)-C(8)       | 117.2(5)    |
| S(2)-Pd(2)-Pd(1)    | 46.92(3)    | C(4)-C(3)-C(2)       | 122.4(4)    |
| S(5)-Pd(2)-Pd(1)    | 46.98(3)    | C(8)-C(3)-C(2)       | 120.3(5)    |
| S(3)-Pd(2)-Pd(1)    | 124.10(3)   | C(3)-C(4)-C(5)       | 121.6(5)    |
| Pd(3)-Pd(2)-Pd(1)   | 116.472(13) | C(6)-C(5)-C(4)       | 120.0(5)    |
| S(4)#1-Pd(3)-S(6)   | 177.69(4)   | C(5)-C(6)-C(7)       | 119.5(6)    |
| S(4)#1-Pd(3)-S(3)   | 97.12(4)    | C(6)-C(7)-C(8)       | 119.9(6)    |
| S(6)-Pd(3)-S(3)     | 80.97(4)    | C(7)-C(8)-C(3)       | 121.7(5)    |
| S(4)#1-Pd(3)-S(1)#1 | 81.77(4)    | C(10)-C(9)-S(2)      | 110.4(3)    |
| S(6)-Pd(3)-S(1)#1   | 100.38(4)   | C(11)-C(10)-C(9)     | 112.3(4)    |

|                   |          |                      |           |
|-------------------|----------|----------------------|-----------|
| C(12)-C(11)-C(16) | 117.9(5) | C(34)-C(33)-S(5)     | 109.3(3)  |
| C(12)-C(11)-C(10) | 120.9(4) | C(35)-C(34)-C(33)    | 112.2(4)  |
| C(16)-C(11)-C(10) | 121.2(4) | C(40)-C(35)-C(36)    | 117.6(4)  |
| C(11)-C(12)-C(13) | 121.7(5) | C(40)-C(35)-C(34)    | 120.7(4)  |
| C(14)-C(13)-C(12) | 118.8(6) | C(36)-C(35)-C(34)    | 121.7(4)  |
| C(13)-C(14)-C(15) | 121.0(6) | C(37)-C(36)-C(35)    | 121.7(5)  |
| C(14)-C(15)-C(16) | 119.0(6) | C(36)-C(37)-C(38)    | 119.9(5)  |
| C(11)-C(16)-C(15) | 121.6(5) | C(37)-C(38)-C(39)    | 119.4(5)  |
| C(18)-C(17)-S(3)  | 111.5(3) | C(40)-C(39)-C(38)    | 119.5(5)  |
| C(19)-C(18)-C(17) | 113.9(4) | C(39)-C(40)-C(35)    | 121.9(5)  |
| C(20)-C(19)-C(24) | 117.7(5) | C(42)-C(41)-S(6)     | 108.4(3)  |
| C(20)-C(19)-C(18) | 120.7(5) | C(43)-C(42)-C(41)    | 111.4(4)  |
| C(24)-C(19)-C(18) | 121.6(4) | C(44)-C(43)-C(48)    | 118.2(4)  |
| C(21)-C(20)-C(19) | 120.3(5) | C(44)-C(43)-C(42)    | 121.3(4)  |
| C(22)-C(21)-C(20) | 121.1(5) | C(48)-C(43)-C(42)    | 120.5(4)  |
| C(23)-C(22)-C(21) | 118.9(5) | C(45)-C(44)-C(43)    | 120.8(5)  |
| C(22)-C(23)-C(24) | 120.5(6) | C(46)-C(45)-C(44)    | 120.3(5)  |
| C(23)-C(24)-C(19) | 121.5(5) | C(47)-C(46)-C(45)    | 119.7(5)  |
| C(26)-C(25)-S(4)  | 109.2(3) | C(46)-C(47)-C(48)    | 120.5(5)  |
| C(27)-C(26)-C(25) | 115.0(4) | C(47)-C(48)-C(43)    | 120.5(5)  |
| C(28)-C(27)-C(32) | 118.4(5) | C(54)-C(49)-C(50)    | 132.0(14) |
| C(28)-C(27)-C(26) | 119.9(4) | C(51)-C(50)-C(49)    | 99.5(12)  |
| C(32)-C(27)-C(26) | 121.7(4) | C(52)-C(51)-C(50)    | 124.9(14) |
| C(27)-C(28)-C(29) | 120.6(5) | C(53)-C(52)-C(51)    | 129(2)    |
| C(30)-C(29)-C(28) | 120.2(5) | C(52)-C(53)-C(54)    | 106.3(15) |
| C(31)-C(30)-C(29) | 118.5(5) | C(49)-C(54)-C(53)    | 125.7(16) |
| C(30)-C(31)-C(32) | 120.9(5) | C(52')-C(53')-C(54') | 108.9(15) |
| C(31)-C(32)-C(27) | 121.3(5) |                      |           |

---

Symmetry transformations used to generate equivalent atoms:

#1 -x+2,-y,-z+1

**Table S6 | Anisotropic displacement parameters ( $\text{\AA}^2 \times 10^3$ ) for  $[\text{Pd}(\text{SC}_2\text{H}_4\text{Ph})_2]_6$ .**The anisotropic displacement factor exponent takes the form:  $-2\pi^2[\text{h}^2 \text{a}^*2\text{U}^{11} + \dots + 2 \text{h k a}^* \text{b}^* \text{U}^{12}]$ 

|       | $\text{U}^{11}$ | $\text{U}^{22}$ | $\text{U}^{33}$ | $\text{U}^{23}$ | $\text{U}^{13}$ | $\text{U}^{12}$ |
|-------|-----------------|-----------------|-----------------|-----------------|-----------------|-----------------|
| Pd(1) | 15(1)           | 14(1)           | 15(1)           | 0(1)            | -1(1)           | 0(1)            |
| Pd(2) | 13(1)           | 15(1)           | 15(1)           | 0(1)            | -1(1)           | 0(1)            |
| Pd(3) | 14(1)           | 15(1)           | 15(1)           | 0(1)            | -2(1)           | 0(1)            |
| S(1)  | 16(1)           | 16(1)           | 17(1)           | -2(1)           | -2(1)           | 2(1)            |
| S(2)  | 18(1)           | 15(1)           | 18(1)           | 0(1)            | 1(1)            | 2(1)            |
| S(3)  | 16(1)           | 16(1)           | 19(1)           | 0(1)            | -1(1)           | 0(1)            |
| S(4)  | 16(1)           | 16(1)           | 17(1)           | -2(1)           | -3(1)           | 0(1)            |
| S(5)  | 16(1)           | 16(1)           | 17(1)           | -1(1)           | 0(1)            | -1(1)           |
| S(6)  | 15(1)           | 17(1)           | 16(1)           | -2(1)           | -1(1)           | 1(1)            |
| C(1)  | 16(2)           | 24(2)           | 27(2)           | 3(2)            | 2(2)            | 2(2)            |
| C(2)  | 16(2)           | 27(3)           | 28(2)           | -2(2)           | -2(2)           | 5(2)            |
| C(3)  | 13(2)           | 30(3)           | 26(2)           | 5(2)            | 1(2)            | 1(2)            |
| C(4)  | 28(3)           | 32(3)           | 29(3)           | -1(2)           | -5(2)           | 2(2)            |
| C(5)  | 38(3)           | 31(3)           | 48(3)           | -11(3)          | -5(3)           | 4(2)            |
| C(6)  | 30(3)           | 29(3)           | 73(4)           | 5(3)            | 1(3)            | 2(2)            |
| C(7)  | 37(3)           | 47(4)           | 50(4)           | 24(3)           | 0(3)            | -1(3)           |
| C(8)  | 27(3)           | 37(3)           | 33(3)           | 6(2)            | 1(2)            | -1(2)           |
| C(9)  | 28(2)           | 17(2)           | 20(2)           | -5(2)           | 1(2)            | 3(2)            |
| C(10) | 29(2)           | 20(2)           | 27(2)           | 0(2)            | 0(2)            | 3(2)            |
| C(11) | 30(2)           | 14(2)           | 26(2)           | 2(2)            | 1(2)            | -1(2)           |
| C(12) | 34(3)           | 22(3)           | 41(3)           | 1(2)            | 2(2)            | 2(2)            |
| C(13) | 63(4)           | 20(3)           | 49(4)           | -1(3)           | 9(3)            | 5(3)            |
| C(14) | 81(5)           | 28(3)           | 37(3)           | -6(3)           | -6(3)           | -12(3)          |
| C(15) | 52(4)           | 47(4)           | 44(4)           | 1(3)            | -14(3)          | -13(3)          |
| C(16) | 31(3)           | 28(3)           | 43(3)           | 2(2)            | -6(2)           | 1(2)            |
| C(17) | 23(2)           | 21(2)           | 21(2)           | 5(2)            | -6(2)           | -3(2)           |
| C(18) | 24(2)           | 24(3)           | 29(3)           | 6(2)            | 1(2)            | -4(2)           |
| C(19) | 26(2)           | 22(3)           | 29(3)           | 5(2)            | 3(2)            | -6(2)           |
| C(20) | 29(3)           | 24(3)           | 39(3)           | 5(2)            | -5(2)           | -2(2)           |
| C(21) | 48(3)           | 36(3)           | 36(3)           | 3(3)            | -11(3)          | -11(3)          |
| C(22) | 60(4)           | 26(3)           | 41(3)           | -4(3)           | -4(3)           | -6(3)           |
| C(23) | 48(3)           | 28(3)           | 58(4)           | -7(3)           | -9(3)           | 6(3)            |
| C(24) | 38(3)           | 30(3)           | 44(3)           | -2(3)           | -11(2)          | 7(2)            |
| C(25) | 20(2)           | 18(2)           | 19(2)           | -2(2)           | -4(2)           | -2(2)           |
| C(26) | 22(2)           | 21(2)           | 26(2)           | -4(2)           | -4(2)           | -4(2)           |

|       |       |       |       |        |        |        |
|-------|-------|-------|-------|--------|--------|--------|
| C(27) | 24(2) | 19(2) | 20(2) | -2(2)  | -5(2)  | 2(2)   |
| C(28) | 29(3) | 27(3) | 43(3) | -12(2) | 9(2)   | -7(2)  |
| C(29) | 52(4) | 29(3) | 49(4) | -19(3) | 11(3)  | -12(3) |
| C(30) | 41(3) | 28(3) | 35(3) | -15(2) | 4(2)   | 6(2)   |
| C(31) | 31(3) | 33(3) | 26(3) | 0(2)   | 2(2)   | 3(2)   |
| C(32) | 27(2) | 22(3) | 27(2) | 1(2)   | -3(2)  | -4(2)  |
| C(33) | 15(2) | 26(2) | 21(2) | 0(2)   | -2(2)  | -3(2)  |
| C(34) | 19(2) | 28(3) | 16(2) | 2(2)   | 2(2)   | -6(2)  |
| C(35) | 18(2) | 28(3) | 19(2) | -4(2)  | -3(2)  | 1(2)   |
| C(36) | 27(2) | 34(3) | 25(2) | 9(2)   | 0(2)   | -9(2)  |
| C(37) | 27(3) | 43(3) | 23(2) | 8(2)   | -6(2)  | 0(2)   |
| C(38) | 24(2) | 51(4) | 30(3) | 0(3)   | -10(2) | -6(2)  |
| C(39) | 32(3) | 52(4) | 41(3) | 20(3)  | -5(2)  | -24(3) |
| C(40) | 32(3) | 56(4) | 27(3) | 13(3)  | -10(2) | -10(3) |
| C(41) | 16(2) | 19(2) | 23(2) | -4(2)  | -3(2)  | 2(2)   |
| C(42) | 20(2) | 17(2) | 18(2) | 0(2)   | 1(2)   | 2(2)   |
| C(43) | 16(2) | 20(2) | 23(2) | -4(2)  | 2(2)   | 2(2)   |
| C(44) | 22(2) | 31(3) | 24(2) | -9(2)  | -1(2)  | 3(2)   |
| C(45) | 34(3) | 26(3) | 43(3) | -14(2) | 2(2)   | 3(2)   |
| C(46) | 37(3) | 22(3) | 58(4) | -4(3)  | -5(3)  | 5(2)   |
| C(47) | 41(3) | 32(3) | 42(3) | 10(3)  | -7(3)  | 8(3)   |
| C(48) | 31(3) | 25(3) | 24(2) | -6(2)  | -5(2)  | 4(2)   |

---

**Table S7 | Hydrogen coordinates ( $\times 10^4$ ) and isotropic displacement parameters ( $\text{\AA}^2 \times 10^3$ ) for  $[\text{Pd}(\text{SC}_2\text{H}_4\text{Ph})_2]_6$ .**

|        | x     | y     | z    | U(eq) |
|--------|-------|-------|------|-------|
| H(1A)  | 5948  | -42   | 6431 | 27    |
| H(1B)  | 5906  | 303   | 7278 | 27    |
| H(2A)  | 5684  | 344   | 4792 | 29    |
| H(2B)  | 4756  | 367   | 5673 | 29    |
| H(4)   | 5878  | 929   | 7281 | 36    |
| H(5)   | 5809  | 1574  | 7274 | 47    |
| H(6)   | 5475  | 1889  | 5532 | 53    |
| H(7)   | 5270  | 1560  | 3786 | 54    |
| H(8)   | 5290  | 919   | 3810 | 39    |
| H(9A)  | 7908  | 1012  | 5051 | 26    |
| H(9B)  | 9072  | 923   | 4756 | 26    |
| H(10A) | 9024  | 1330  | 3138 | 30    |
| H(10B) | 7835  | 1400  | 3325 | 30    |
| H(12)  | 7357  | 1930  | 4412 | 39    |
| H(13)  | 7722  | 2429  | 5656 | 53    |
| H(14)  | 9339  | 2473  | 6527 | 58    |
| H(15)  | 10576 | 2021  | 6202 | 57    |
| H(16)  | 10193 | 1526  | 4962 | 41    |
| H(17A) | 11005 | 778   | 737  | 26    |
| H(17B) | 10429 | 1149  | 1049 | 26    |
| H(18A) | 12545 | 1006  | 1570 | 31    |
| H(18B) | 12161 | 1279  | 578  | 31    |
| H(20)  | 13275 | 1321  | 3188 | 37    |
| H(21)  | 13290 | 1801  | 4550 | 48    |
| H(22)  | 12092 | 2281  | 4426 | 51    |
| H(23)  | 10860 | 2272  | 2929 | 54    |
| H(24)  | 10829 | 1796  | 1570 | 45    |
| H(25A) | 8667  | -808  | 4248 | 23    |
| H(25B) | 8204  | -1085 | 5186 | 23    |
| H(26A) | 6710  | -1165 | 4051 | 27    |
| H(26B) | 7046  | -850  | 3174 | 27    |
| H(28)  | 6678  | -1726 | 3073 | 40    |
| H(29)  | 7369  | -2163 | 1782 | 52    |



|        |       |       |       |     |
|--------|-------|-------|-------|-----|
| H(30)  | 8933  | -2043 | 822   | 41  |
| H(31)  | 9734  | -1476 | 1117  | 36  |
| H(32)  | 9038  | -1045 | 2380  | 30  |
| H(33A) | 6534  | -232  | 2163  | 24  |
| H(33B) | 7055  | 70    | 1354  | 24  |
| H(34A) | 7695  | -367  | 78    | 25  |
| H(34B) | 7525  | -691  | 991   | 25  |
| H(36)  | 6335  | -224  | -1333 | 34  |
| H(37)  | 4762  | -359  | -2196 | 37  |
| H(38)  | 3649  | -777  | -1301 | 42  |
| H(39)  | 4101  | -1034 | 532   | 50  |
| H(40)  | 5687  | -902  | 1360  | 46  |
| H(41A) | 10694 | -543  | 2219  | 23  |
| H(41B) | 10073 | -533  | 1013  | 23  |
| H(42A) | 11645 | -502  | -62   | 22  |
| H(42B) | 12284 | -489  | 1127  | 22  |
| H(44)  | 11554 | -1093 | -1002 | 31  |
| H(45)  | 11604 | -1734 | -963  | 41  |
| H(46)  | 11786 | -2046 | 819   | 47  |
| H(47)  | 12000 | -1715 | 2549  | 46  |
| H(48)  | 11928 | -1072 | 2531  | 32  |
| H(49)  | 6369  | 3144  | 6245  | 88  |
| H(51)  | 3760  | 2550  | 6708  | 105 |
| H(52)  | 4581  | 2330  | 8354  | 114 |
| H(53)  | 6340  | 2308  | 8546  | 57  |
| H(54)  | 7135  | 2828  | 7400  | 91  |
| H(49') | 6677  | 2999  | 6721  | 88  |
| H(52') | 3339  | 2836  | 5664  | 89  |
| H(53') | 4099  | 3327  | 4972  | 60  |
| H(54') | 5953  | 3383  | 5677  | 87  |

---

## References

- S1. Lee, C., Yang, W. & Parr, R. G. Local softness and chemical-reactivity in the molecules CO, SCN<sup>-</sup> and H<sub>2</sub>CO. *J. Mol. Struct.* **40**, 305-313 (1988).
- S2. Lee, C., Yang, W. & Parr, R. G. Development of the colle-salvetti correlation-energy formula into a functional of the electron density. *Phys. Rev. B* **37**, 785-789 (1988).
- S3. Morrison, R. C., Yang, W., Parr, R. G. & Lee, C. Approximate density matrices and wigner distribution functions from density, kinetic energy density, and idempotency constraints. *Int. J. Quantum Chem.* **38**, 819-830 (1990).
- S4. Yang, W., Parr, R. G. & Lee, C. Various functionals for the kinetic energy density of an atom or molecule. *Phys. Rev. A* **34**, 4586-4590 (1986).
- S5. Hay, P. J. & Wadt, W. R. *Ab initio* effective core potentials for molecular calculations. Potentials for the transition metal atoms Sc to Hg. *J. Chem. Phys.* **82**, 270-283 (1985).
- S6. Wadt, W. R. & Hay, P. J. *Ab initio* effective core potentials for molecular calculations. Potentials for main group elements Na to Bi. *J. Chem. Phys.* **82**, 284-298 (1985).
- S7. Hay, P. J. & Wadt, W. R. *Ab initio* effective core potentials for molecular calculations. Potentials for K to Au including the outermost core orbitals. *J. Chem. Phys.* **82**, 299-310 (1985).
- S8. Rassolov, V. A., Pople, J. A., Ratner, M. A. & Windus, T. L. 6-31G\* basis set for atoms K through Zn. *J. Chem. Phys.* **109**, 1223-1229 (1998).
- S9. Rassolov, V. A., Ratner, M. A., Pople, J. A., Redfern, P. C. & Curtiss, L. A. 6-31G\* basis set for third-row atoms. *J. Comput. Chem.* **22**, 976-984 (2001).
- S10. Frisch, M. *et al.* Gaussian, Inc., Wallingford, CT (2010).
- S11. Kruger, T., Krebs, B. & Henkel, G. Nickel complexes containing sterically demanding thiolate ligands: [Ni<sub>8</sub>S(SC<sub>4</sub>H<sub>9</sub>)<sub>9</sub>]<sup>-</sup>, a mixed-valence nickel sulfide thiolate cluster, and [Ni<sub>4</sub>(SC<sub>3</sub>H<sub>7</sub>)<sub>8</sub>], a homoleptic nickel thiolate. *Angew. Chem. Int. Ed.* **28**, 61-62 (1989).
- S12. Kriege, M. & Henkel, G. Ni<sub>5</sub>(SET)<sub>10</sub> and Ni<sub>4</sub>(SC<sub>6</sub>H<sub>11</sub>)<sub>8</sub>, homoleptic nickel-thiolates with pentagonal-prismatic and cubane-like sulfur frameworks. *Z. Naturforsch. B* **42**, 1121-1128 (1987).
- S13. Gaete, W., Ros, T., Solans, X. Font-Atllaba, M. & Brioso, J. L. Synthesis and crystal and molecular structure of *cyclo*-tetrakis[bis(μ-N-methylpiperidine-4-thiolato)nickel(II)]. *Inorg. Chem.* **23**, 39-43 (1984).
- S14. Mahmoudkhani, A. H. & Langer, V. A novel oligomerization versus metal chelation: synthesis and crystal structure of pentakis[di-μ-(diisopropylaminoethanethiolato)nickel]. *Inorg. Chim. Acta* **294**, 83-86 (1999).
- S15. Koo, B. K. Block, E. Kang, H. Liu, S. & Zubieta, J. Synthesis and structural characterization of *cyclo*-pentakis[bis(μ-trimethylsilylthiomethane)nickel(II)], [Ni(SC<sub>2</sub>H<sub>5</sub>SiMe<sub>3</sub>)<sub>2</sub>]<sub>5</sub>, a pentametallic tiara structure. *Polyhedron* **7**, 1397-1399 (1988).
- S16. Wark, T. A. & Stephan, D. W. Early metal thiolato species as metalloligands in the formation of early/late heterobimetallic complexes: syntheses and molecular structures of Cp<sub>2</sub>Ti(SMe)<sub>2</sub>, Cp<sub>2</sub>V(SMe)<sub>2</sub>, (Cp<sub>2</sub>Ti(μ-SMe)<sub>2</sub>)<sub>2</sub>Ni and (Ni(μ-SMe)<sub>2</sub>)<sub>6</sub>. *Organometallics* **8**, 2836-2843 (1989).
- S17. Schulbert, K. & Mattes, R. Structure of 2 polynuclear nickel-thiolato-complexes [(μ-SMe)<sub>2</sub>(Ni(MeNHCS<sub>2</sub>))<sub>2</sub>] and *cyclo*-[(μ-SMe)<sub>2</sub>Ni]<sub>6</sub>. *Z. Naturforsch. B* **49**, 770-772 (1994).
- S18. Woodward, P., Dahl, L. F., Abel, E. W. & Crosse, B. C. A new type of cyclic transition metal complex, [Ni(SC<sub>2</sub>H<sub>5</sub>)<sub>2</sub>]<sub>6</sub>. *J. Am. Chem. Soc.* **87**, 5251-5253 (1965).
- S19. Miyamae, H. & Yamamura, T. Structure of the triclinic form of hexakis[di-μ-(ethanethiolato)nickel], and redetermination of its monoclinic form. *Acta Crystallogr. C* **44**, 606-609 (1988).
- S20. Feld, H. *et al.* High mass resolution plasma desorption and secondary ion mass-spectrometry of neutral nickel thiolate complexes- crystal-structure of Ni<sub>6</sub>(SC<sub>3</sub>H<sub>7</sub>)<sub>12</sub>. *Z. Naturforsch. B* **47**, 929-936 (1992).
- S21. Xiao, H. L., Jian, F. F. & Zhang, K. J. Synthesis and structure analysis of α and β forms of [12] metallacrown-6 nickel(II) complex: [Ni<sub>6</sub>(SCH<sub>2</sub>CH<sub>2</sub>CH<sub>3</sub>)<sub>12</sub>]. *Bull. Korean Chem. Soc.* **30**, 846-848 (2009).

- S22. Gould, R. O. & Harding, M. M. Nickel and palladium complexes of 1-hydroxyethane-2-thiol and analogues. Part I. Crystal structure of cyclohexakis[bis-( $\mu$ -1-hydroxyethane-2-thiolato)-nickel(II)]. *J. Chem. Soc. A* 875-881 (1970).
- S23. Jian, F.-F., Jiao, K., Li, Y., Zhao, P.-S. & Lu, L.-D.  $[\text{Ni}_6(\text{SCH}_2\text{CH}_2\text{OH})_{12}]$ : A double crown [12]metallacrown-6 nickel(II) cluster. *Angew. Chem. Int. Ed.* **42**, 5722-5724 (2003).
- S24. Sletten, J. & Kovacs, J. A. The structure of a toroidal, neutral, homoleptic Ni(II) complex with a chelate dithiolate ligand,  $[\text{Ni}_6(\text{SCH}_2\text{CH}_2\text{CH}_2\text{S})_6]$ . *Acta Chem. Scand.* **48**, 929-932 (1994).
- S25. Tan, C. *et al.* In situ synthesis of nickel tiara-like clusters with two different thiolate bridges. *Dalton Trans.* **41**, 8472-8476 (2012).
- S26. Zhang, C., Takada, S., Kolzer, M., Matsumoto, T. & Tatsumi, K. Nickel(II) thiolate complexes with a flexible *cyclo*- $\{\text{Ni}_{10}\text{S}_{20}\}$  framework. *Angew. Chem. Int. Ed.* **45**, 3768-3772 (2006)
- S27. Capdevila, M. *et al.* Preparation and X-ray crystal structure of  $[\text{Ni}_6\{\mu\text{-S}(\text{CH}_2)_3\text{N}(\text{CH}_3)_2\}_{12}]$ , a cyclic hexameric homothiolate of nickel. *Polyhedron* **8**, 1253-1259 (1989).
- S28. Barrera, H., Bayon, J. C., Suades, J., Germain, C. & Declercq, J. P. Metal complexes of mercaptoamines-III. Different behaviour of  $\beta$ - and  $\gamma$ -(N,N-dimethyl)-mercaptoamines. *Polyhedron* **3**, 969-975 (1984).
- S29. Angamuthu, R. & Bouwman, E. Reduction of protons assisted by a hexanuclear nickel thiolate metallacrown: protonation and electrocatalytic dihydrogen evolution. *Phys. Chem. Chem. Phys.* **11**, 5578-5583 (2009).
- S30. Cai J.-H. & Kang B.-S. Synthesis and structure of hexakis [di- $\mu$ -(4-chloro-brnzylthio) nickel] tritetrachloromethane solvate,  $[\text{Ni}(\text{SCH}_2\text{C}_6\text{H}_4\text{Cl-}i>p)_2]_6 \cdot 3\text{CCl}_4$ . *Jiegou Huaxue (Chinese J. Struct. Chem.)* **12**, 397-400(1993).
- S31. Mahmoudkhani, A. H. & Langer, V. Structural investigation of nickel thiolates: a cyclic hexanuclear nickel thiolate with highly distorted  $\text{NiS}_4$  units. *Polyhedron* **18**, 3407-3410 (1999).
- S32. Zhu, M., Zhou, S., Yao, C., Liao, L. & Wu, Z. Reduction-resistant and reduction-catalytic double-crown nickel nanoclusters. *Nanoscale* **6**, 14195-14199 (2014).
- S33. Kagalwala, H. N. *et al.* Photocatalytic hydrogen generation system using a nickel-thiolate hexameric cluster. *Inorg. Chem.* **52**, 9094-9101 (2013).
- S34. Dance, I. G., Scudder, M. L. & Secomb, R. *c*- $\text{Ni}_8(\text{SCH}_2\text{COOEt})_{16}$ , a receptive octagonal toroid. *Inorg. Chem.* **24**, 1201-1208 (1985).
- S35. Ivanov, S. A., Kozee, M. A., Alex M, W., Agarwal, S. & Dahl, L. F. *Cyclo*- $[\text{Ni}(\mu_2\text{-SPh})_2]_9$  and *cyclo*- $[\text{Ni}(\mu_2\text{-SPh})_2]_{11}$ : new oligomeric types of toroidal nickel(II) thiolates containing geometrically unprecedented 9- and 11-membered ring systems. *J. Chem. Soc., Dalton Trans.* 4105-4115 (2002).
- S36. Zhang, C. *et al.* Dodecanuclear-ellipse and decanuclear-wheel nickel(II) thiolato clusters with efficient femtosecond nonlinear absorption. *Angew. Chem. Int. Ed.* **49**, 4209-4212 (2010).
- S37. Stash, A. I., Perepelkova, T. I., Noskov, Y. G., Buslaeva, T. M. & Romm, I. P. Palladium clusters  $\text{Pd}_4(\text{SEt})_4(\text{OAc})_4$  and  $\text{Pd}_6(\text{SEt})_{12}$ : structure and properties. *Russ. J. Coord. Chem.* **27**, 585-590 (2001).
- S38. Kunchur, N.G. The crystal structure of palladium n-propyl mercaptide. *Acta Crystallogr. B* **24**, 1623-1633 (1968).
- S39. Higgins, J. D. & William Suggs, J. Preparation, structure and spectroscopic studies of the palladium mercaptides  $\text{Pd}_8(\text{S-nPr})_{16}$  and  $\text{Pd}_6(\text{S-nPr})_{12}$ . *Inorg. Chim. Acta* **145**, 247-252 (1988).
- S40. Stash, A. I. *et al.* Palladium clusters  $\text{Pd}_4(\text{SR})_4(\text{OAc})_4$  and  $\text{Pd}_6(\text{SR})_{12}$  (R = Bu, Ph): Structure and properties. *Russ. J. Coord. Chem.* **35**, 136-141 (2009).
- S41. Ananikov, V. P. *et al.* Catalytic adaptive recognition of thiol (SH) and selenol (SeH) groups toward synthesis of functionalized vinyl monomers. *J. Am. Chem. Soc.* **134**, 6637-6649 (2012).
- S42. Yang, Z., Smetana, A. B., Sorensen, C. M. & Klabunde, K. J. Synthesis and characterization of a new tiara Pd(II) thiolate complex,  $[\text{Pd}(\text{SC}_{12}\text{H}_{25})_2]_6$ , and its solution-phase thermolysis to prepare nearly monodisperse palladium sulfide nanoparticles. *Inorg. Chem.* **46**, 2427-2431 (2007).
- S43. Schneider, I., Horner, M. & Olendzki, R. N. Structure of cyclo-hexakis[bis- $\mu$ -(methoxycarbonylmethylthiolato)-palladium(II)],  $[\text{Pd}(\text{SCH}_2\text{COOCH}_3)_2]_6$ . *Acta Crystallogr. C* **49**, 2091-2093 (1993).
- S44. Yamashina, Y., Kataoka, Y. & Ura, Y. Tiara-like octanuclear palladium(II) and platinum(II) thiolates and their inclusion

complexes with dihalo- or iodoalkanes. *Inorg. Chem.* **53**, 3558-3567 (2014).
